# Supplementary material for: Modeling DNA oxidation in water
Source: Royal Society of Chemistry journal article supplement (doi:10.1039/c7cp02029e), 2017-01-01
Supplement: c7cp02029e1.pdf [file c7cp02029e1.pdf]

## Modeling DNA oxidation in water

– Electronic Supporting Information (ESI) –

*Amedeo Capobianco\**, *Alessandro Landi*, and *Andrea Peluso*

Dipartimento di Chimica e Biologia "Adolfo Zambelli". Università di Salerno, Via G. Paolo II. I-84084 Fisciano (SA), Italy

e-mail: [acapobianco@unisa.it](mailto:acapobianco@unisa.it)

### Section S1: Adopted constraints in geometry optimizations

C1'-C1' distances and C1'-C3'...C3'-C1' dihedral angles involving consecutive ribose rings have been held fixed for all the steps in all the sequences.

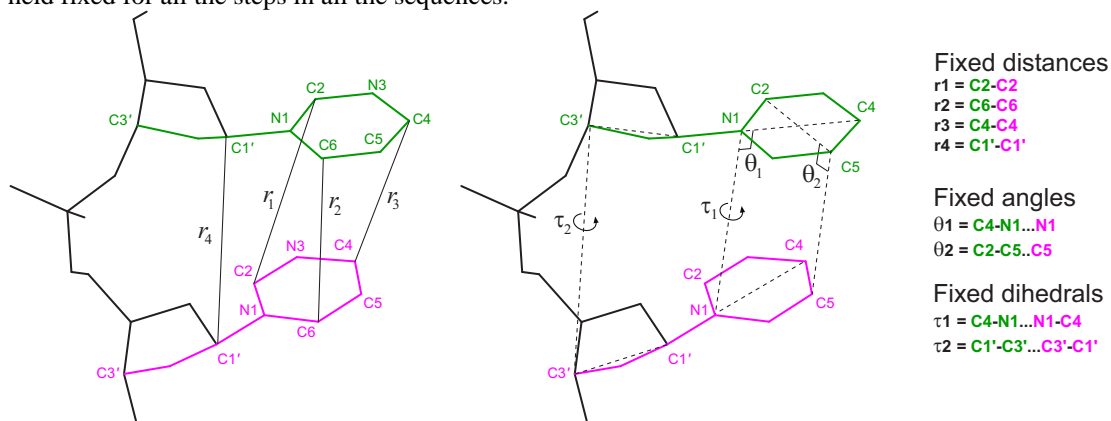

**Figure S1:** Internal coordinates held fixed in 5'-Pyrimidine-Pyrimidine-3' steps. C6 has to be replaced with N for 6-deaza uracil.

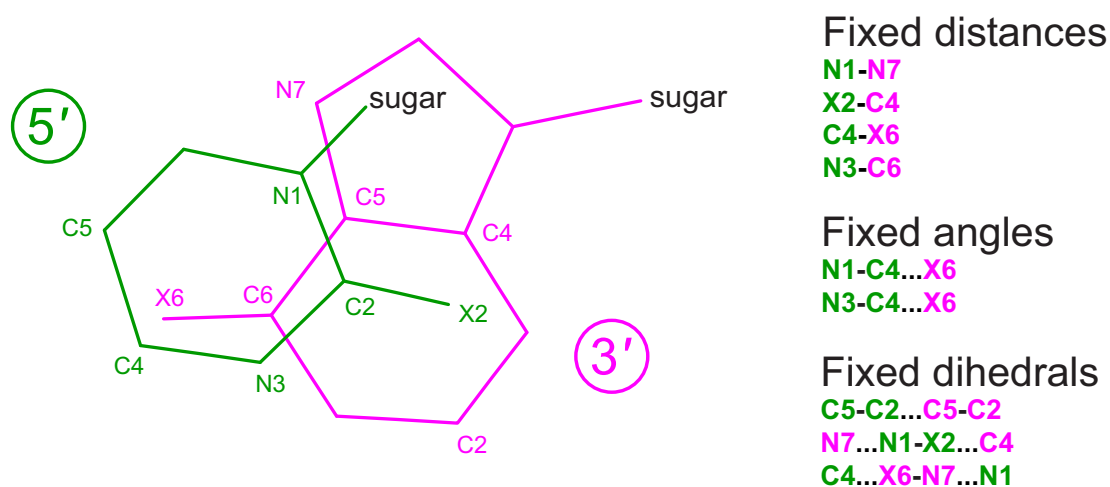

**Figure S2:** Constrained inter base coordinates for 5'-Pyrimidine-Purine-3' steps. X symbols denote heteroatoms.

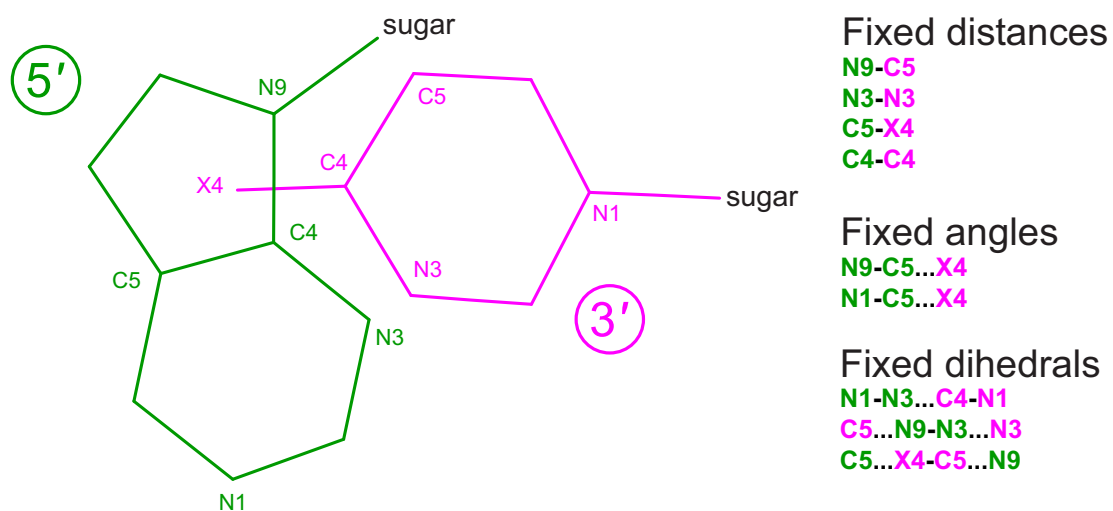

**Figure S3:** Constrained inter base coordinates for 5'-Purine-Pyrimidine-3' steps. X symbols denote heteroatoms.

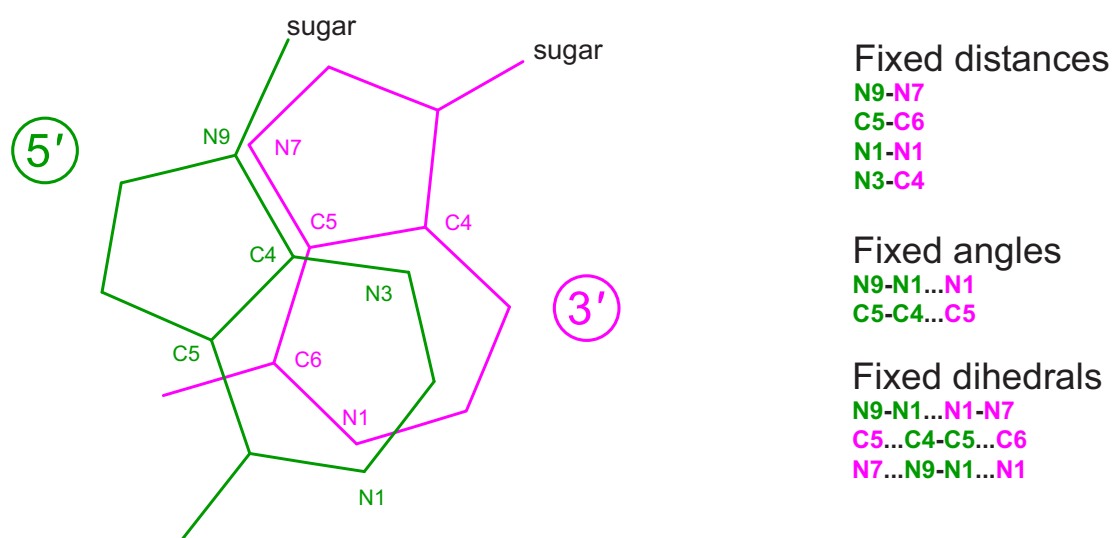

**Figure S4:** Constrained inter base coordinates for 5'-Purine-Purine-3' steps.

## Section S2: Optimized geometries of free and embedded DNA nucleobases

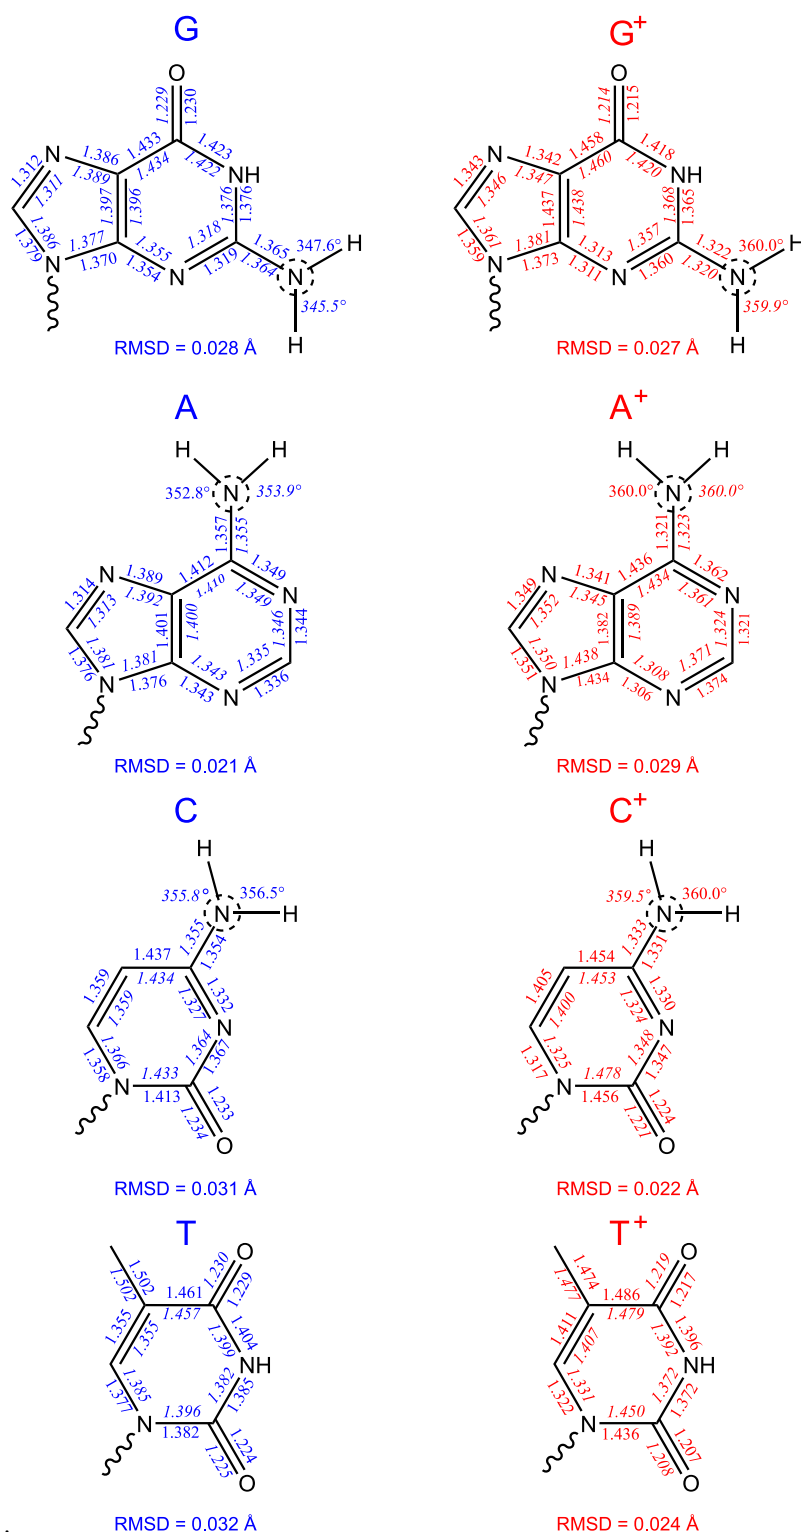

**Figure S5:** Geometric parameters (bond lengths in Å, angles in degrees) for neutral (blue) and singly ionized (red) free DNA nucleobases (roman font) and DNA nucleobases in XXYY single strands (italicized font) optimized at the PCM/B3LYP-D/TZVP level.

### Section S3: local base steps coordinates and puckering conformations of single strands

XACX cation

Local base step parameters

| step  |      | Shift | Slide | Rise | Tilt | Roll | Twist |
|-------|------|-------|-------|------|------|------|-------|
| 1     | X/A  | 0.13  | 0.43  | 3.20 | 6.64 | 2.40 | 33.15 |
| 2     | A/C  | 0.48  | 0.44  | 3.38 | 4.00 | 0.97 | 36.76 |
| 3     | C/X  | 0.49  | 0.58  | 3.33 | 4.88 | 0.89 | 36.96 |
| ~~~~~ |      |       |       |      |      |      |       |
|       | ave. | 0.37  | 0.48  | 3.30 | 5.17 | 1.42 | 35.63 |
|       | s.d. | 0.20  | 0.09  | 0.09 | 1.35 | 0.85 | 2.14  |

\*\*\*\*\*

base Puckering

- 1 C2'-endo
- 2 C1'-exo
- 3 O4'-endo
- 4 C2'-endo

XACX neutral

Local base step parameters

| step  |      | Shift | Slide | Rise | Tilt | Roll | Twist |
|-------|------|-------|-------|------|------|------|-------|
| 1     | X/A  | 0.12  | 0.40  | 3.21 | 6.33 | 2.11 | 33.03 |
| 2     | A/C  | 0.46  | 0.44  | 3.38 | 3.85 | 2.44 | 36.95 |
| 3     | C/X  | 0.49  | 0.56  | 3.39 | 3.97 | 1.10 | 37.10 |
| ~~~~~ |      |       |       |      |      |      |       |
|       | ave. | 0.36  | 0.47  | 3.33 | 4.72 | 1.89 | 35.70 |
|       | s.d. | 0.21  | 0.08  | 0.10 | 1.40 | 0.70 | 2.31  |

\*\*\*\*\*

base Puckering

- 1 C2'-endo
- 2 C1'-exo
- 3 O4'-endo
- 4 C2'-endo

XAGX cation

Local base step parameters

| step  |      | Shift | Slide | Rise | Tilt | Roll  | Twist |
|-------|------|-------|-------|------|------|-------|-------|
| 1     | X/A  | 0.15  | 0.42  | 3.22 | 6.48 | 1.64  | 32.97 |
| 2     | A/G  | 0.33  | 0.37  | 3.30 | 4.94 | 1.97  | 35.47 |
| 3     | G/X  | 0.80  | 0.66  | 3.24 | 5.99 | -1.16 | 39.33 |
| ~~~~~ |      |       |       |      |      |       |       |
|       | ave. | 0.43  | 0.48  | 3.25 | 5.81 | 0.82  | 35.92 |
|       | s.d. | 0.33  | 0.15  | 0.04 | 0.79 | 1.72  | 3.20  |

\*\*\*\*\*

base Puckering

- 1 C2'-endo
- 2 C2'-endo
- 3 C1'-exo
- 4 C2'-endo

XAGX neutral

Local base step parameters

| step  |      | Shift | Slide | Rise | Tilt | Roll | Twist |
|-------|------|-------|-------|------|------|------|-------|
| 1     | X/A  | 0.15  | 0.41  | 3.23 | 6.15 | 1.76 | 33.01 |
| 2     | A/G  | 0.34  | 0.37  | 3.28 | 5.32 | 2.27 | 35.30 |
| 3     | G/X  | 0.83  | 0.69  | 3.11 | 7.87 | 0.11 | 39.12 |
| ~~~~~ |      |       |       |      |      |      |       |
|       | ave. | 0.44  | 0.49  | 3.21 | 6.45 | 1.38 | 35.81 |
|       | s.d. | 0.35  | 0.17  | 0.09 | 1.30 | 1.12 | 3.08  |

\*\*\*\*\*

base Puckering

- 1 C2'-endo
- 2 C1'-exo
- 3 C1'-exo
- 4 C2'-endo

XATX cation

Local base step parameters

| step |     | Shift | Slide | Rise | Tilt | Roll  | Twist |
|------|-----|-------|-------|------|------|-------|-------|
| 1    | X/A | 0.10  | 0.42  | 3.19 | 6.61 | 2.72  | 33.17 |
| 2    | A/T | 0.32  | 0.31  | 3.58 | 1.12 | -0.80 | 36.02 |
| 3    | T/X | 0.61  | 0.52  | 3.33 | 4.57 | 1.08  | 39.03 |

```

~~~~~
ave.      0.34      0.42      3.37      4.10      1.00      36.07
s.d.     0.25      0.10      0.20      2.78      1.76      2.93
*****
base Puckering
1  C2'-endo
2  C1'-exo
3  O4'-endo
4  C2'-endo

XATX neutral
Local base step parameters
step      Shift      Slide      Rise      Tilt      Roll      Twist
1  X/A      0.09      0.40      3.19      6.68      2.20      33.00
2  A/T      0.36      0.37      3.46      2.92      0.01      36.01
3  T/X      0.62      0.49      3.33      4.52      0.76      39.20
~~~~~
ave.      0.36      0.42      3.33      4.71      0.99      36.07
s.d.     0.26      0.07      0.13      1.88      1.11      3.10
*****
base Puckering
1  C2'-endo
2  C1'-exo
3  O4'-endo
4  C2'-endo

XCAX cation
Local base step parameters
step      Shift      Slide      Rise      Tilt      Roll      Twist
1  X/C      0.28      0.48      3.27      4.86      2.68      33.39
2  C/A      0.41      0.48      3.27      5.47      2.63      37.05
3  A/X      0.63      0.62      3.30      5.19      -1.16     37.46
~~~~~
ave.      0.44      0.53      3.28      5.17      1.38      35.97
s.d.     0.18      0.08      0.02      0.30      2.21      2.24
*****
base Puckering
1  C2'-endo
2  C2'-endo
3  C1'-exo
4  C2'-endo

XCAX neutral
Local base step parameters
step      Shift      Slide      Rise      Tilt      Roll      Twist
1  X/C      0.27      0.47      3.30      4.51      2.69      33.32
2  C/A      0.43      0.48      3.30      5.14      2.90      36.85
3  A/X      0.67      0.67      3.15      7.19      0.52      37.15
~~~~~
ave.      0.46      0.54      3.25      5.61      2.04      35.77
s.d.     0.20      0.12      0.09      1.40      1.32      2.13
*****
base Puckering
1  C2'-endo
2  C1'-exo
3  O4'-endo
4  C2'-endo

XAAX neutral
Local base step parameters
step      Shift      Slide      Rise      Tilt      Roll      Twist
1  X/A      0.05      0.48      3.42      3.76      -1.64     33.22
2  A/A      0.37      0.45      3.31      4.79      1.99      35.97
3  A/X      0.59      0.66      3.18      8.73      -2.86     37.32
~~~~~
ave.      0.34      0.53      3.30      5.76      -0.83     35.50
s.d.     0.27      0.12      0.12      2.62      2.52      2.09
*****
base Puckering
1  C2'-endo
2  C2'-endo
3  C1'-exo
4  C1'-exo

XAAX cation
Local base step parameters
step      Shift      Slide      Rise      Tilt      Roll      Twist

```

```

1 X/A      0.30    1.25    3.28    5.53    5.69    33.01
2 A/A      0.42    0.48    3.29    4.91    2.70    36.14
3 A/X      0.58    0.66    3.22    8.29   -3.04    37.20
~~~~~
ave.      0.44    0.80    3.26    6.24    1.78    35.45
s.d.      0.14    0.40    0.03    1.47    4.44    2.18
*****
base Puckering
1 C2'-endo
2 C2'-endo
3 C1'-exo
4 C1'-exo

XCCX cation
Local base step parameters
step      Shift      Slide      Rise      Tilt      Roll      Twist
1 X/C      0.45    0.45    3.29    4.77    1.88    35.66
2 C/C      0.43    0.39    3.48    1.33    2.58    36.59
3 C/X      0.38    0.64    3.26    6.05    1.55    35.05
~~~~~
ave.      0.42    0.49    3.34    4.05    2.00    35.76
s.d.      0.04    0.13    0.12    2.44    0.52    0.78
*****
base Puckering
1 C2'-endo
2 C1'-exo
3 C1'-exo
4 C1'-exo

XCCX neutral
Local base step parameters
step      Shift      Slide      Rise      Tilt      Roll      Twist
1 X/C      0.42    0.46    3.28    4.79    2.47    35.32
2 C/C      0.43    0.45    3.41    2.69    2.64    36.25
3 C/X      0.42    0.57    3.31    5.29    1.07    35.77
~~~~~
ave.      0.42    0.49    3.33    4.25    2.06    35.78
s.d.      0.01    0.07    0.07    1.38    0.86    0.47
*****
base Puckering
1 C2'-endo
2 C1'-exo
3 C1'-exo
4 C1'-exo

XCGX cation
Local base step parameters
step      Shift      Slide      Rise      Tilt      Roll      Twist
1 X/C      0.32    0.50    3.24    5.43    2.67    33.99
2 C/G      0.19    0.45    3.25    5.64    3.07    34.08
3 G/X      0.82    0.64    3.32    4.92   -2.11    40.05
~~~~~
ave.      0.44    0.53    3.27    5.33    1.21    36.04
s.d.      0.33    0.10    0.05    0.37    2.88    3.47
*****
base Puckering
1 C2'-endo
2 C1'-exo
3 C1'-exo
4 C2'-endo

XCGX neutral
Local base step parameters
step      Shift      Slide      Rise      Tilt      Roll      Twist
1 X/C      0.32    0.48    3.27    4.87    2.84    34.13
2 C/G      0.22    0.45    3.27    5.42    2.86    34.04
3 G/X      0.87    0.70    3.14    7.32   -0.46    39.66
~~~~~
ave.      0.47    0.54    3.23    5.87    1.74    35.94
s.d.      0.35    0.14    0.07    1.28    1.91    3.21
*****
base Puckering
1 C2'-endo
2 C1'-exo
3 C1'-exo
4 C2'-endo

```

XCTX cation

Local base step parameters

| step  |      | Shift | Slide | Rise | Tilt | Roll | Twist |
|-------|------|-------|-------|------|------|------|-------|
| 1     | X/C  | 0.40  | 0.45  | 3.32 | 4.37 | 2.13 | 35.12 |
| 2     | C/T  | 0.27  | 0.43  | 3.42 | 2.47 | 3.11 | 34.26 |
| 3     | T/X  | 0.60  | 0.56  | 3.30 | 5.54 | 0.47 | 38.32 |
| ~~~~~ |      |       |       |      |      |      |       |
|       | ave. | 0.43  | 0.48  | 3.35 | 4.13 | 1.90 | 35.90 |
|       | s.d. | 0.17  | 0.07  | 0.07 | 1.55 | 1.33 | 2.14  |

\*\*\*\*\*

base Puckering

- 1 C2'-endo
- 2 C1'-exo
- 3 O4'-endo
- 4 C2'-endo

XCTX neutral

Local base step parameters

| step  |      | Shift | Slide | Rise | Tilt | Roll | Twist |
|-------|------|-------|-------|------|------|------|-------|
| 1     | X/C  | 0.36  | 0.48  | 3.29 | 4.52 | 3.11 | 34.71 |
| 2     | C/T  | 0.28  | 0.46  | 3.36 | 3.75 | 2.76 | 34.05 |
| 3     | T/X  | 0.63  | 0.51  | 3.34 | 4.73 | 0.25 | 38.97 |
| ~~~~~ |      |       |       |      |      |      |       |
|       | ave. | 0.43  | 0.48  | 3.33 | 4.33 | 2.04 | 35.91 |
|       | s.d. | 0.18  | 0.02  | 0.04 | 0.51 | 1.56 | 2.67  |

\*\*\*\*\*

base Puckering

- 1 C2'-endo
- 2 C1'-exo
- 3 O4'-endo
- 4 C2'-endo

XGAX cation

Local base step parameters

| step  |      | Shift | Slide | Rise | Tilt | Roll  | Twist |
|-------|------|-------|-------|------|------|-------|-------|
| 1     | X/G  | 0.12  | 0.34  | 3.25 | 5.68 | 2.62  | 32.22 |
| 2     | G/A  | 0.40  | 0.55  | 3.27 | 5.43 | 2.12  | 36.83 |
| 3     | A/X  | 0.70  | 0.61  | 3.17 | 7.06 | -0.24 | 38.39 |
| ~~~~~ |      |       |       |      |      |       |       |
|       | ave. | 0.41  | 0.50  | 3.23 | 6.05 | 1.50  | 35.81 |
|       | s.d. | 0.29  | 0.14  | 0.05 | 0.88 | 1.53  | 3.21  |

\*\*\*\*\*

base Puckering

- 1 C2'-endo
- 2 C2'-endo
- 3 O4'-endo
- 4 C2'-endo

XGAX neutral

Local base step parameters

| step  |      | Shift | Slide | Rise | Tilt | Roll  | Twist |
|-------|------|-------|-------|------|------|-------|-------|
| 1     | X/G  | 0.10  | 0.33  | 3.24 | 5.71 | 3.23  | 32.22 |
| 2     | G/A  | 0.42  | 0.55  | 3.27 | 5.47 | 2.44  | 36.75 |
| 3     | A/X  | 0.70  | 0.61  | 3.19 | 6.82 | -0.38 | 38.48 |
| ~~~~~ |      |       |       |      |      |       |       |
|       | ave. | 0.41  | 0.50  | 3.23 | 6.00 | 1.76  | 35.81 |
|       | s.d. | 0.30  | 0.15  | 0.04 | 0.72 | 1.90  | 3.23  |

\*\*\*\*\*

base Puckering

- 1 C2'-endo
- 2 C2'-endo
- 3 O4'-endo
- 4 C2'-endo

XGCX cation

Local base step parameters

| step  |      | Shift | Slide | Rise | Tilt | Roll  | Twist |
|-------|------|-------|-------|------|------|-------|-------|
| 1     | X/G  | 0.07  | 0.30  | 3.17 | 6.89 | 1.87  | 32.68 |
| 2     | G/C  | 0.52  | 0.48  | 3.46 | 2.90 | -0.24 | 38.03 |
| 3     | C/X  | 0.49  | 0.56  | 3.33 | 4.81 | 0.66  | 37.02 |
| ~~~~~ |      |       |       |      |      |       |       |
|       | ave. | 0.36  | 0.45  | 3.32 | 4.87 | 0.77  | 35.91 |
|       | s.d. | 0.25  | 0.13  | 0.14 | 2.00 | 1.06  | 2.85  |

\*\*\*\*\*

base Puckering

- 1 C2'-endo
- 2 C1'-exo
- 3 O4'-endo

4 C2'-endo

XGCX neutral

Local base step parameters

| step  | Shift | Slide | Rise | Tilt | Roll | Twist |
|-------|-------|-------|------|------|------|-------|
| 1 X/G | 0.11  | 0.32  | 3.21 | 6.20 | 2.27 | 32.49 |
| 2 G/C | 0.56  | 0.52  | 3.34 | 4.44 | 2.25 | 37.87 |
| 3 C/X | 0.49  | 0.55  | 3.36 | 4.41 | 0.81 | 37.10 |
| ave.  | 0.39  | 0.46  | 3.30 | 5.02 | 1.78 | 35.82 |
| s.d.  | 0.24  | 0.12  | 0.08 | 1.02 | 0.84 | 2.91  |

\*\*\*\*\*

base Puckering

- 1 C2'-endo
- 2 C2'-endo
- 3 O4'-endo
- 4 C2'-endo

XGGX cation

Local base step parameters

| step  | Shift | Slide | Rise | Tilt | Roll  | Twist |
|-------|-------|-------|------|------|-------|-------|
| 1 X/G | -0.24 | 1.07  | 3.45 | 2.43 | -3.36 | 32.95 |
| 2 G/G | 0.35  | 0.46  | 3.27 | 5.38 | -0.15 | 36.08 |
| 3 G/X | 0.86  | 0.71  | 3.13 | 7.65 | -0.59 | 39.56 |
| ave.  | 0.32  | 0.74  | 3.28 | 5.15 | -1.37 | 36.20 |
| s.d.  | 0.55  | 0.31  | 0.16 | 2.62 | 1.74  | 3.31  |

\*\*\*\*\*

base Puckering

- 1 C2'-endo
- 2 C2'-endo
- 3 C1'-exo
- 4 C2'-endo

XGGX neutral

Local base step parameters

| step  | Shift | Slide | Rise | Tilt | Roll  | Twist |
|-------|-------|-------|------|------|-------|-------|
| 1 X/G | 0.10  | 0.32  | 3.27 | 5.31 | 2.57  | 31.95 |
| 2 G/G | 0.39  | 0.48  | 3.25 | 5.91 | 1.80  | 35.97 |
| 3 G/X | 0.87  | 0.72  | 3.09 | 8.15 | -0.00 | 39.30 |
| ave.  | 0.45  | 0.51  | 3.20 | 6.46 | 1.46  | 35.74 |
| s.d.  | 0.39  | 0.20  | 0.10 | 1.49 | 1.32  | 3.68  |

\*\*\*\*\*

base Puckering

- 1 C2'-endo
- 2 C1'-exo
- 3 C1'-exo
- 4 C2'-endo

XGTX cation

Local base step parameters

| step  | Shift | Slide | Rise | Tilt | Roll  | Twist |
|-------|-------|-------|------|------|-------|-------|
| 1 X/G | 0.05  | 0.33  | 3.20 | 6.25 | 3.35  | 32.23 |
| 2 G/T | 0.40  | 0.38  | 3.57 | 1.25 | -1.67 | 37.07 |
| 3 T/X | 0.61  | 0.50  | 3.29 | 5.08 | 0.77  | 39.12 |
| ave.  | 0.35  | 0.40  | 3.36 | 4.19 | 0.82  | 36.14 |
| s.d.  | 0.28  | 0.09  | 0.19 | 2.61 | 2.51  | 3.54  |

\*\*\*\*\*

base Puckering

- 1 C2'-endo
- 2 C1'-exo
- 3 O4'-endo
- 4 C2'-endo

XGTX neutral

Local base step parameters

| step  | Shift | Slide | Rise | Tilt | Roll  | Twist |
|-------|-------|-------|------|------|-------|-------|
| 1 X/G | 0.09  | 0.33  | 3.22 | 5.89 | 3.04  | 32.25 |
| 2 G/T | 0.44  | 0.43  | 3.45 | 2.99 | -0.36 | 37.05 |
| 3 T/X | 0.62  | 0.48  | 3.30 | 5.04 | 0.46  | 39.22 |
| ave.  | 0.38  | 0.41  | 3.32 | 4.64 | 1.05  | 36.17 |
| s.d.  | 0.27  | 0.08  | 0.11 | 1.49 | 1.77  | 3.57  |

\*\*\*\*\*

base Puckering

- 1 C2'-endo



2 C1'-exo  
 3 O4'-endo  
 4 C2'-endo

XXAX cation

Local base step parameters

| step  |      | Shift | Slide | Rise | Tilt | Roll  | Twist |
|-------|------|-------|-------|------|------|-------|-------|
| 1     | X/X  | 0.45  | 0.51  | 3.32 | 5.04 | -0.29 | 35.47 |
| 2     | X/A  | 0.16  | 0.48  | 3.31 | 4.63 | 4.64  | 32.90 |
| 3     | A/X  | 0.74  | 0.59  | 3.30 | 5.29 | -1.62 | 38.81 |
| ~~~~~ |      |       |       |      |      |       |       |
|       | ave. | 0.45  | 0.53  | 3.31 | 4.99 | 0.91  | 35.73 |
|       | s.d. | 0.29  | 0.05  | 0.01 | 0.33 | 3.30  | 2.96  |

\*\*\*\*\*

base Puckering

1 C2'-endo  
 2 C2'-endo  
 3 C1'-exo  
 4 C2'-endo

XXAX neutral

Local base step parameters

| step  |      | Shift | Slide | Rise | Tilt | Roll  | Twist |
|-------|------|-------|-------|------|------|-------|-------|
| 1     | X/X  | 0.44  | 0.50  | 3.33 | 4.94 | -0.19 | 35.44 |
| 2     | X/A  | 0.15  | 0.46  | 3.29 | 4.96 | 4.23  | 32.69 |
| 3     | A/X  | 0.78  | 0.64  | 3.14 | 7.37 | 0.15  | 38.49 |
| ~~~~~ |      |       |       |      |      |       |       |
|       | ave. | 0.46  | 0.53  | 3.25 | 5.76 | 1.40  | 35.54 |
|       | s.d. | 0.31  | 0.09  | 0.10 | 1.40 | 2.46  | 2.90  |

\*\*\*\*\*

base Puckering

1 C2'-endo  
 2 C2'-endo  
 3 C1'-exo  
 4 C2'-endo

XXCX cation

Local base step parameters

| step  |      | Shift | Slide | Rise | Tilt | Roll | Twist |
|-------|------|-------|-------|------|------|------|-------|
| 1     | X/X  | 0.44  | 0.44  | 3.40 | 3.52 | 0.20 | 35.50 |
| 2     | X/C  | 0.42  | 0.41  | 3.39 | 2.96 | 2.47 | 35.89 |
| 3     | C/X  | 0.43  | 0.59  | 3.39 | 3.81 | 1.16 | 35.76 |
| ~~~~~ |      |       |       |      |      |      |       |
|       | ave. | 0.43  | 0.48  | 3.39 | 3.43 | 1.28 | 35.72 |
|       | s.d. | 0.01  | 0.09  | 0.01 | 0.44 | 1.14 | 0.20  |

\*\*\*\*\*

base Puckering

1 C2'-endo  
 2 C2'-endo  
 3 O4'-endo  
 4 C2'-endo

XXCX neutral

Local base step parameters

| step  |      | Shift | Slide | Rise | Tilt | Roll  | Twist |
|-------|------|-------|-------|------|------|-------|-------|
| 1     | X/X  | 0.44  | 0.45  | 3.39 | 3.85 | -0.00 | 35.41 |
| 2     | X/C  | 0.34  | 0.50  | 3.29 | 4.22 | 4.00  | 35.00 |
| 3     | C/X  | 0.50  | 0.50  | 3.45 | 2.90 | 0.25  | 36.73 |
| ~~~~~ |      |       |       |      |      |       |       |
|       | ave. | 0.43  | 0.48  | 3.38 | 3.65 | 1.41  | 35.71 |
|       | s.d. | 0.08  | 0.03  | 0.08 | 0.68 | 2.24  | 0.91  |

\*\*\*\*\*

base Puckering

1 C2'-endo  
 2 C2'-endo  
 3 C1'-exo  
 4 C2'-endo

XXGX cation

Local base step parameters

| step  |      | Shift | Slide | Rise | Tilt | Roll  | Twist |
|-------|------|-------|-------|------|------|-------|-------|
| 1     | X/X  | 0.45  | 0.50  | 3.31 | 5.39 | -0.31 | 35.24 |
| 2     | X/G  | 0.14  | 0.38  | 3.31 | 4.36 | 4.91  | 32.28 |
| 3     | G/X  | 0.78  | 0.61  | 3.34 | 4.67 | -2.05 | 39.65 |
| ~~~~~ |      |       |       |      |      |       |       |
|       | ave. | 0.46  | 0.50  | 3.32 | 4.81 | 0.85  | 35.72 |
|       | s.d. | 0.32  | 0.11  | 0.02 | 0.53 | 3.62  | 3.71  |

\*\*\*\*\*

base Puckering  
1 C2'-endo  
2 C2'-endo  
3 C1'-exo  
4 C2'-endo

XXGX neutral

Local base step parameters

| step  | Shift | Slide | Rise | Tilt | Roll  | Twist |
|-------|-------|-------|------|------|-------|-------|
| 1 X/X | 0.45  | 0.49  | 3.33 | 5.05 | -0.26 | 35.36 |
| 2 X/G | 0.16  | 0.39  | 3.32 | 4.46 | 4.65  | 32.27 |
| 3 G/X | 0.84  | 0.68  | 3.12 | 7.57 | -0.31 | 39.18 |
| ave.  | 0.48  | 0.52  | 3.26 | 5.69 | 1.36  | 35.60 |
| s.d.  | 0.34  | 0.15  | 0.12 | 1.65 | 2.85  | 3.46  |

\*\*\*\*\*

base Puckering  
1 C2'-endo  
2 C2'-endo  
3 C1'-exo  
4 C2'-endo

XXTX cation

Local base step parameters

| step  | Shift | Slide | Rise | Tilt | Roll  | Twist |
|-------|-------|-------|------|------|-------|-------|
| 1 X/X | 0.45  | 0.47  | 3.36 | 4.54 | -0.18 | 35.50 |
| 2 X/T | 0.28  | 0.43  | 3.38 | 3.23 | 3.14  | 33.72 |
| 3 T/X | 0.56  | 0.58  | 3.29 | 5.50 | 1.03  | 37.94 |
| ave.  | 0.43  | 0.49  | 3.34 | 4.42 | 1.33  | 35.72 |
| s.d.  | 0.14  | 0.08  | 0.04 | 1.14 | 1.68  | 2.12  |

\*\*\*\*\*

base Puckering  
1 C2'-endo  
2 C2'-endo  
3 O4'-endo  
4 C2'-endo

XXTX neutral

Local base step parameters

| step  | Shift | Slide | Rise | Tilt | Roll  | Twist |
|-------|-------|-------|------|------|-------|-------|
| 1 X/X | 0.45  | 0.48  | 3.34 | 4.88 | -0.28 | 35.43 |
| 2 X/T | 0.20  | 0.50  | 3.29 | 4.62 | 4.09  | 32.66 |
| 3 T/X | 0.63  | 0.49  | 3.35 | 4.47 | 0.23  | 39.04 |
| ave.  | 0.43  | 0.49  | 3.33 | 4.66 | 1.35  | 35.71 |
| s.d.  | 0.21  | 0.01  | 0.03 | 0.21 | 2.39  | 3.20  |

\*\*\*\*\*

base Puckering  
1 C2'-endo  
2 C2'-endo  
3 C1'-exo  
4 C2'-endo

XTAX cation

Local base step parameters

| step  | Shift | Slide | Rise | Tilt | Roll  | Twist |
|-------|-------|-------|------|------|-------|-------|
| 1 X/T | 0.23  | 0.47  | 3.24 | 5.58 | 2.43  | 32.50 |
| 2 T/A | 0.35  | 0.45  | 3.27 | 5.43 | 3.44  | 36.53 |
| 3 A/X | 0.71  | 0.57  | 3.29 | 5.26 | -1.22 | 38.50 |
| ave.  | 0.43  | 0.50  | 3.27 | 5.42 | 1.55  | 35.85 |
| s.d.  | 0.25  | 0.06  | 0.03 | 0.16 | 2.45  | 3.06  |

\*\*\*\*\*

base Puckering  
1 C2'-endo  
2 C1'-exo  
3 C1'-exo  
4 C2'-endo

XTAX neutral

Local base step parameters

| step  | Shift | Slide | Rise | Tilt | Roll | Twist |
|-------|-------|-------|------|------|------|-------|
| 1 X/T | 0.23  | 0.46  | 3.25 | 5.42 | 2.42 | 32.40 |
| 2 T/A | 0.36  | 0.45  | 3.27 | 5.53 | 3.24 | 36.33 |
| 3 A/X | 0.74  | 0.62  | 3.15 | 7.18 | 0.29 | 38.22 |

|      |      |      |      |      |      |       |
|------|------|------|------|------|------|-------|
| ave. | 0.44 | 0.51 | 3.22 | 6.04 | 1.98 | 35.65 |
| s.d. | 0.27 | 0.09 | 0.06 | 0.99 | 1.52 | 2.97  |

\*\*\*\*\*

```
base Puckering
1 C2'-endo
2 C1'-exo
3 C1'-exo
4 C2'-endo
```

XTCX cation

Local base step parameters

| step  | Shift | Slide | Rise | Tilt | Roll  | Twist |
|-------|-------|-------|------|------|-------|-------|
| 1 X/T | 0.26  | 0.45  | 3.29 | 5.03 | 2.17  | 32.82 |
| 2 T/C | 0.55  | 0.39  | 3.41 | 2.15 | 3.24  | 38.74 |
| 3 C/X | 0.48  | 0.59  | 3.31 | 5.61 | -0.28 | 36.13 |

```
~~~~~
ave. 0.43 0.48 3.34 4.26 1.71 35.90
s.d. 0.15 0.10 0.06 1.85 1.80 2.97
```

\*\*\*\*\*

```
base Puckering
1 C2'-endo
2 C1'-exo
3 C1'-exo
4 C2'-endo
```

XTCX neutral

Local base step parameters

| step  | Shift | Slide | Rise | Tilt | Roll  | Twist |
|-------|-------|-------|------|------|-------|-------|
| 1 X/T | 0.22  | 0.47  | 3.25 | 5.48 | 2.69  | 32.30 |
| 2 T/C | 0.55  | 0.43  | 3.37 | 3.02 | 3.33  | 38.49 |
| 3 C/X | 0.52  | 0.55  | 3.34 | 5.04 | -0.59 | 36.75 |

```
~~~~~
ave. 0.43 0.48 3.32 4.52 1.81 35.85
s.d. 0.18 0.06 0.06 1.31 2.11 3.19
```

\*\*\*\*\*

```
base Puckering
1 C2'-endo
2 C1'-exo
3 C1'-exo
4 C2'-endo
```

XTGX cation

Local base step parameters

| step  | Shift | Slide | Rise | Tilt | Roll  | Twist |
|-------|-------|-------|------|------|-------|-------|
| 1 X/T | 0.23  | 0.49  | 3.23 | 5.91 | 2.39  | 32.25 |
| 2 T/G | 0.31  | 0.37  | 3.25 | 5.51 | 3.58  | 35.60 |
| 3 G/X | 0.78  | 0.62  | 3.32 | 4.96 | -1.91 | 39.65 |

```
~~~~~
ave. 0.44 0.49 3.27 5.46 1.35 35.84
s.d. 0.30 0.13 0.05 0.48 2.89 3.71
```

\*\*\*\*\*

```
base Puckering
1 C2'-endo
2 C1'-exo
3 C1'-exo
4 C2'-endo
```

XTGX neutral

Local base step parameters

| step  | Shift | Slide | Rise | Tilt | Roll  | Twist |
|-------|-------|-------|------|------|-------|-------|
| 1 X/T | 0.23  | 0.46  | 3.26 | 5.43 | 2.46  | 32.39 |
| 2 T/G | 0.34  | 0.37  | 3.28 | 5.30 | 3.31  | 35.57 |
| 3 G/X | 0.84  | 0.68  | 3.12 | 7.52 | -0.17 | 39.22 |

```
~~~~~
ave. 0.47 0.51 3.22 6.08 1.87 35.73
s.d. 0.33 0.16 0.08 1.24 1.81 3.42
```

\*\*\*\*\*

```
base Puckering
1 C2'-endo
2 C1'-exo
3 C1'-exo
4 C2'-endo
```

XTTX cation

Local base step parameters

| step  | Shift | Slide | Rise | Tilt | Roll | Twist |
|-------|-------|-------|------|------|------|-------|
| 1 X/T | 0.28  | 0.44  | 3.30 | 4.62 | 2.00 | 33.61 |
| 2 T/T | 0.42  | 0.32  | 3.44 | 2.10 | 2.15 | 36.45 |

```

3 T/X      0.61      0.61      3.30      7.47      -1.76      37.26
~~~~~
ave.      0.44      0.46      3.35      4.73      0.80      35.77
s.d.      0.16      0.15      0.08      2.69      2.22      1.91
*****
base Puckering
1 C2'-endo
2 C1'-exo
3 C1'-exo
4 C1'-exo

XTTX neutral
Local base step parameters
step Shift Slide Rise Tilt Roll Twist
1 X/T 0.25 0.45 3.27 5.03 2.37 33.13
2 T/T 0.43 0.37 3.38 3.42 2.12 36.15
3 T/X 0.64 0.57 3.35 6.58 -1.67 38.01
~~~~~
ave. 0.44 0.46 3.33 5.01 0.94 35.76
s.d. 0.20 0.10 0.05 1.58 2.27 2.46
*****
base Puckering
1 C2'-endo
2 C1'-exo
3 C1'-exo
4 C1'-exo

```

## Section S4: results obtained by using the TZVP basis set

**Table S1:** Predicted (PCM-B3LYP-D/TZVP) adiabatic ionization potentials (eV) of nucleobases (Y) and of XXYX single stranded oligonucleotides

|   | Y    | XXYX |
|---|------|------|
| G | 5.79 | 5.82 |
| A | 6.20 | 6.25 |
| C | 6.55 | 6.50 |
| T | 6.55 | 6.52 |

**Table S2:** Adiabatic ionization potentials (eV, TZVP basis set) of 5'-XYZX-3' single strands

| Y (5' side) | Z (3' side) |      |      |      |
|-------------|-------------|------|------|------|
|             | G           | A    | C    | T    |
|             | 5.73        | 5.77 | 5.76 | 5.78 |
|             | 5.79        | 6.01 | 6.17 | 6.22 |
|             | 5.75        | 6.15 | 6.38 | 6.38 |
|             | 5.80        | 6.23 | 6.41 | 6.40 |

**Table S3:** Predicted electronic couplings (eV, TZVP basis set) for 5'-YZ-3' steps

| Y (5' side) | Z (3' side) |      |      |      |
|-------------|-------------|------|------|------|
|             | G           | A    | C    | T    |
|             | 0.09        | 0.16 | 0.23 | 0.16 |
|             | 0.12        | 0.24 | 0.16 | 0.10 |
|             | 0.25        | 0.18 | 0.12 | 0.13 |
|             | 0.13        | 0.08 | 0.10 | 0.12 |

**Table S4:** Hole energies (eV) relative to XXGX of single strands predicted by PCM/B3LYP-D/TZVP computations and by using the TB Hamiltonian. Deviations<sup>a</sup> of TB from DFT results are in eV

| ss                 | TB                  | DFT                | ss                           | TB             | DFT                 |
|--------------------|---------------------|--------------------|------------------------------|----------------|---------------------|
| XAGA               | -0.08               | -0.09              | XCAC                         | 0.28           | 0.29                |
| AAGA               | -0.09               | -0.09              | CCAC                         | 0.28           | 0.28                |
| TGAC               | -0.08               | -0.06              | XTAT                         | 0.38           | 0.39                |
| TAGC               | -0.11               | -0.11              | TTAT                         | 0.38           | 0.39                |
| XCGC               | -0.14               | -0.14              | TCAT                         | 0.31           | 0.32                |
| CCGC               | -0.14               | -0.15              | CTAC                         | 0.34           | 0.34                |
| XTGT               | -0.06               | -0.06              | CAAC                         | 0.14           | 0.14                |
| TTGT               | -0.06               | -0.06              | TAAT                         | 0.18           | 0.19                |
| AGGA               | -0.13               | -0.11              | CAAT                         | 0.15           | 0.14                |
| CGGC               | -0.16               | -0.16              | TAAC                         | 0.16           | 0.17                |
| TGGT               | -0.12               | -0.11              | XTCT                         | 0.52           | 0.52                |
| TGGA               | -0.12               | -0.14              | TTCT                         | 0.51           | 0.52                |
| CGGT               | -0.14               | -0.15              | TCCT                         | 0.49           | 0.49                |
| MUE <sup>a</sup>   | MSE                 | RMSD               | L. dev. (seq)                | R <sup>2</sup> | intercept           |
| $7 \times 10^{-3}$ | $-2 \times 10^{-3}$ | $9 \times 10^{-3}$ | $2 \times 10^{-2}$<br>(AGGA) | 0.999          | $-4 \times 10^{-4}$ |

<sup>a</sup>MUE/MSE denote mean unsigned/signed errors; RMSD is the root mean square deviation. Signed largest deviation is reported for the corresponding sequence.  $R^2$  is the linear correlation coefficient between DFT and TB calculated hole energies. The linear fitting using DFT values as abscissa and TB ones as ordinate returns 0.99 and  $-4 \times 10^{-4}$  eV as the slope and the intercept, respectively.

## Section S5: Statistical analysis for the symmetric couplings

**Table S5:** Hole energies (eV) relative to XXGX of single strands predicted by PCM/B3LYP-D/TZV+P computations and by using the TB Hamiltonian with symmetric 5'-YZ-3' couplings, see Eq. (5) in the main text. Deviations of TB from DFT results are in eV

| ss                   | TB                    | DFT                  | ss                           | TB             | DFT                  |
|----------------------|-----------------------|----------------------|------------------------------|----------------|----------------------|
| XGAX                 | -0.05                 | -0.05                | XACX                         | 0.34           | 0.35                 |
| XAGX                 | -0.05                 | -0.03                | XCAX                         | 0.34           | 0.33                 |
| AAGA                 | -0.10                 | -0.10                | CCAC                         | 0.28           | 0.28                 |
| TGAC                 | -0.07                 | -0.06                | XATX                         | 0.40           | 0.40                 |
| TAGC                 | -0.11                 | -0.11                | XTAX                         | 0.40           | 0.41                 |
| XGCX                 | -0.07                 | -0.08                | TTAT                         | 0.38           | 0.38                 |
| XCGX                 | -0.07                 | -0.07                | TCAT                         | 0.32           | 0.32                 |
| CCGC                 | -0.14                 | -0.14                | CTAC                         | 0.33           | 0.34                 |
| XGTX                 | -0.03                 | -0.04                | CAAC                         | 0.14           | 0.14                 |
| XTGX                 | -0.03                 | -0.02                | TAAT                         | 0.18           | 0.19                 |
| TTGT                 | -0.05                 | -0.06                | CAAT                         | 0.16           | 0.14                 |
| AGGA                 | -0.13                 | -0.11                | TAAC                         | 0.16           | 0.17                 |
| CGGC                 | -0.16                 | -0.16                | XCTX                         | 0.57           | 0.56                 |
| TGGT                 | -0.11                 | -0.11                | XTCX                         | 0.57           | 0.58                 |
| TGGA                 | -0.12                 | -0.14                | TTCT                         | 0.50           | 0.52                 |
| CGGT                 | -0.14                 | -0.15                | TCCT                         | 0.49           | 0.49                 |
| MUE <sup>a</sup>     | MSE                   | RMSD                 | L. dev. (seq)                | R <sup>2</sup> | intercept            |
| 8 x 10 <sup>-3</sup> | -8 x 10 <sup>-4</sup> | 1 x 10 <sup>-2</sup> | -2 x 10 <sup>-2</sup> (TTCT) | 0.999          | 5 x 10 <sup>-4</sup> |

<sup>a</sup>MUE/MSE denote mean unsigned/signed errors; RMSD is the root mean square deviation. Signed largest deviation is reported for the corresponding sequence. R<sup>2</sup> is the linear correlation coefficient between DFT and TB calculated hole energies. The linear fitting using DFT values as abscissa and TB predictions as ordinate returns 0.99 and 5 x 10<sup>-4</sup> eV as the slope and the intercept, respectively.

## Cartesian coordinates

| XAAX |          |          |          |      |           |          |          |
|------|----------|----------|----------|------|-----------|----------|----------|
| O    | -9.85446 | 0.10734  | 0.23297  | H    | -10.09257 | -1.84058 | -0.49185 |
| C    | -9.67437 | -0.86705 | -0.79043 | H    | -10.16045 | -0.55730 | -1.72748 |
| C    | -8.18980 | -1.05570 | -1.05577 | H    | -8.06597  | -1.91484 | -1.72593 |
| O    | -7.64945 | 0.12011  | -1.69258 | H    | -7.95055  | -1.67397 | 1.04509  |
| C    | -7.35306 | -1.27422 | 0.22122  | H    | -7.56224  | 0.74291  | 0.93358  |
| O    | -6.29748 | -2.20087 | -0.11703 | H    | -5.60822  | 0.09489  | -1.32224 |
| C    | -6.78674 | 0.11769  | 0.48886  | H    | -4.63298  | 4.14784  | -2.86651 |
| C    | -6.51840 | 0.56363  | -0.94262 | H    | -5.89238  | 0.09666  | 1.10928  |
| N    | -6.34247 | 1.99750  | -1.13757 | H    | -3.98302  | -4.74062 | -1.51267 |
| C    | -5.43338 | 2.41660  | -2.12268 | H    | -4.87698  | -3.20964 | -1.70604 |
| O    | -4.81975 | 1.63354  | -2.82990 | H    | -2.38592  | -3.27933 | -2.37250 |
| N    | -5.30544 | 3.79304  | -2.19285 | H    | -1.91853  | -4.20774 | 0.24972  |
| C    | -6.02398 | 4.72131  | -1.44239 | H    | -2.55074  | -2.05663 | 1.21278  |
| O    | -5.85430 | 5.92542  | -1.55581 | H    | -1.01681  | -0.84679 | -1.14984 |
| C    | -6.97928 | 4.08623  | -0.51564 | H    | -3.70838  | -0.18543 | 1.45351  |
| N    | -7.11482 | 2.81199  | -0.38989 | H    | -0.19075  | 3.29547  | -2.65446 |
| P    | -5.45986 | -2.90502 | 1.10358  | H    | -3.64562  | 4.69430  | 1.05254  |
| O    | -6.35889 | -3.81257 | 1.91977  | H    | -2.79864  | 5.79131  | 0.03478  |
| O    | -4.71148 | -1.86689 | 1.92851  | H    | -0.76171  | -1.89463 | 1.08512  |
| O    | -4.42844 | -3.82285 | 0.24078  | H    | 2.64698   | -3.75777 | -3.14114 |
| C    | -4.08167 | -3.71225 | -1.15003 | H    | 1.11743   | -2.93161 | -2.74944 |
| C    | -2.75965 | -2.99034 | -1.38161 | H    | 3.22293   | -1.51472 | -3.00794 |
| O    | -2.96434 | -1.56439 | -1.35246 | H    | 4.36025   | -3.20824 | -0.99149 |
| C    | -1.68348 | -3.30239 | -0.31561 | H    | 3.20356   | -2.03986 | 0.77714  |
| O    | -0.41662 | -3.46592 | -0.98739 | H    | 3.48779   | 0.46954  | -0.95177 |
| C    | -1.69088 | -2.03390 | 0.53750  | H    | 1.23545   | -1.22092 | 1.63250  |
| C    | -1.92255 | -0.99262 | -0.55003 | H    | 2.36089   | 4.74933  | -0.46619 |
| N    | -2.32699 | 0.31294  | -0.10572 | H    | -1.05459  | 2.83753  | 2.99973  |
| C    | -3.21471 | 0.61139  | 0.90739  | H    | -0.93577  | 4.47043  | 2.53092  |
| N    | -3.39572 | 1.90019  | 1.07941  | H    | 4.68438   | -1.01599 | 0.62871  |
| C    | -2.58359 | 2.49730  | 0.12101  | H    | 7.70023   | 0.61480  | -3.67601 |
| C    | -2.29580 | 3.83627  | -0.20907 | H    | 6.07721   | 0.39976  | -2.97462 |
| N    | -2.83449 | 4.88219  | 0.47800  | H    | 7.46328   | 2.52010  | -2.43998 |
| N    | -1.45567 | 4.08660  | -1.23249 | H    | 9.32976   | 0.65948  | -1.26964 |
| C    | -0.88174 | 3.03613  | -1.85506 | H    | 7.98753   | 0.44304  | 0.70752  |
| N    | -1.04678 | 1.73148  | -1.62441 | H    | 7.15587   | 3.34873  | 0.22245  |
| C    | -1.92589 | 1.52080  | -0.63615 | H    | 3.77527   | 3.78695  | 3.13854  |
| P    | 0.82716  | -4.10095 | -0.11714 | H    | 8.95426   | 1.89716  | 1.16101  |
| O    | 0.52954  | -5.53583 | 0.27051  | H    | 10.29338  | 2.68965  | -0.77049 |
| O    | 1.20239  | -3.20137 | 1.05082  | H    | -10.80687 | 0.18107  | 0.39620  |
| O    | 1.98037  | -4.11731 | -1.26697 | H    | -7.60198  | 4.72739  | 0.09880  |
| C    | 2.10574  | -3.20356 | -2.36804 | H    | 5.00651   | -0.25458 | 3.38585  |
| C    | 2.89423  | -1.94294 | -2.05078 | Na   | -5.82689  | -2.58735 | 3.96096  |
| O    | 2.05855  | -0.98890 | -1.37545 | Na   | 0.77665   | -4.98707 | 2.64228  |
| C    | 4.14876  | -2.14840 | -1.15739 | Na   | 7.67416   | -3.96419 | 0.44988  |
| O    | 5.25461  | -1.52463 | -1.83854 | XACX |           |          |          |
| C    | 3.79527  | -1.39321 | 0.12343  | O    | 9.82464   | 0.05178  | 0.29694  |
| C    | 2.89473  | -0.29989 | -0.44294 | C    | 9.61883   | 1.08220  | -0.66494 |
| N    | 2.06658  | 0.39704  | 0.51023  | C    | 8.13210   | 1.21754  | -0.94685 |
| C    | 1.26010  | -0.14686 | 1.49267  | O    | 7.66472   | 0.05735  | -1.66857 |
| N    | 0.55896  | 0.75176  | 2.14954  | C    | 7.26596   | 1.31556  | 0.32896  |
| C    | 0.91664  | 1.95250  | 1.56016  | O    | 6.19431   | 2.24184  | 0.05079  |
| C    | 0.50255  | 3.27047  | 1.79003  | C    | 6.73296   | -0.10281 | 0.47567  |
| N    | -0.45048 | 3.59752  | 2.70947  | C    | 6.52445   | -0.46339 | -0.99172 |
| N    | 1.05505  | 4.24190  | 1.04195  | N    | 6.39563   | -1.89423 | -1.25434 |
| C    | 1.95371  | 3.91437  | 0.09999  | C    | 5.48094   | -2.32423 | -2.22829 |
| N    | 2.40174  | 2.70076  | -0.24412 | O    | 4.83744   | -1.54933 | -2.91737 |
| C    | 1.85144  | 1.75750  | 0.53707  | N    | 5.38651   | -3.70358 | -2.31038 |
| P    | 6.78142  | -1.90508 | -1.36345 | C    | 6.05457   | -4.62323 | -1.50177 |
| O    | 7.15529  | -3.29729 | -1.83858 | O    | 5.84241   | -5.82431 | -1.56452 |
| O    | 6.97616  | -1.66793 | 0.12236  | C    | 7.01897   | -3.97857 | -0.59143 |
| O    | 7.60763  | -0.83145 | -2.27276 | N    | 7.16310   | -2.70408 | -0.49432 |
| C    | 7.14635  | 0.44146  | -2.74797 | P    | 5.31740   | 2.82514  | 1.30774  |
| C    | 7.41949  | 1.61589  | -1.81611 | O    | 6.17549   | 3.69416  | 2.20563  |
| O    | 6.35026  | 1.76967  | -0.86444 | O    | 4.58308   | 1.71060  | 2.04016  |
| C    | 8.73801  | 1.54002  | -0.99977 | O    | 4.27373   | 3.77528  | 0.49660  |
| O    | 9.46365  | 2.74237  | -1.27114 | C    | 3.95498   | 3.73876  | -0.90349 |
| C    | 8.23896  | 1.47461  | 0.44884  | C    | 2.68168   | 2.96634  | -1.21209 |
| C    | 6.95030  | 2.28041  | 0.32798  | O    | 2.94394   | 1.55009  | -1.25615 |
| N    | 6.00394  | 2.14813  | 1.42820  | C    | 1.54133   | 3.17119  | -0.18244 |
| C    | 5.20461  | 3.24982  | 1.77628  | O    | 0.33245   | 3.36327  | -0.93950 |
| O    | 5.24915  | 4.32533  | 1.20579  | C    | 1.51333   | 1.83999  | 0.55485  |
| N    | 4.36847  | 3.01043  | 2.86103  | C    | 1.86489   | 0.88660  | -0.58693 |
| C    | 4.18131  | 1.78803  | 3.49512  | N    | 2.30092   | -0.42496 | -0.17529 |
| O    | 3.38187  | 1.63005  | 4.40430  | C    | 3.20550   | -0.71501 | 0.82722  |
| C    | 5.06506  | 0.73918  | 2.95502  | N    | 3.44969   | -1.99889 | 0.96238  |
| N    | 5.90400  | 0.92634  | 1.99582  | C    | 2.66259   | -2.60439 | -0.01280 |





|      |           |          |          |   |          |          |          |
|------|-----------|----------|----------|---|----------|----------|----------|
| C    | -4.95461  | -3.37963 | 1.81751  | N | 2.29051  | -0.41850 | -0.16253 |
| O    | -4.98177  | -4.45220 | 1.23853  | C | 3.22537  | -0.71120 | 0.81001  |
| N    | -4.09602  | -3.12475 | 2.87950  | N | 3.45576  | -1.99652 | 0.94820  |
| C    | -3.89046  | -1.89076 | 3.48400  | C | 2.62410  | -2.60117 | 0.00980  |
| O    | -3.04699  | -1.69883 | 4.34465  | C | 2.40563  | -3.93672 | -0.37910 |
| C    | -4.82282  | -0.86674 | 2.98688  | N | 2.98873  | -4.98730 | 0.25840  |
| N    | -5.69502  | -1.07246 | 2.06112  | N | 1.56284  | -4.17929 | -1.40213 |
| H    | 10.08459  | 2.02670  | -0.32870 | C | 0.91530  | -3.14202 | -1.96907 |
| H    | 10.20743  | 0.81790  | -1.63348 | N | 1.00875  | -1.84668 | -1.67719 |
| H    | 8.07583   | 2.12196  | -1.60013 | C | 1.89621  | -1.63471 | -0.69533 |
| H    | 7.93824   | 1.70036  | 1.16096  | P | -0.99828 | 3.96143  | -0.20714 |
| H    | 7.54332   | -0.68693 | 0.88971  | O | -0.78946 | 5.38875  | 0.25534  |
| H    | 5.66305   | 0.08445  | -1.39183 | O | -1.51771 | 3.01524  | 0.86437  |
| H    | 7.55024   | -4.57653 | 0.04273  | O | -1.96180 | 4.00015  | -1.52113 |
| H    | 4.62018   | -3.95770 | -2.95345 | C | -2.07490 | 2.92384  | -2.46654 |
| H    | 5.86758   | -0.06012 | 1.05417  | C | -2.86172 | 1.71151  | -1.98373 |
| H    | 3.94584   | 4.91125  | -1.22316 | O | -2.03047 | 0.80531  | -1.26235 |
| H    | 4.89347   | 3.42907  | -1.50804 | C | -4.06468 | 2.02601  | -1.06772 |
| H    | 2.42146   | 3.45078  | -2.18509 | O | -5.23293 | 1.99748  | -1.90077 |
| H    | 1.87587   | 4.21084  | 0.49082  | C | -3.98426 | 0.95455  | 0.04670  |
| H    | 2.43705   | 1.99444  | 1.32366  | C | -2.91822 | -0.00594 | -0.48143 |
| H    | 1.07618   | 0.93453  | -1.21380 | N | -2.09740 | -0.71770 | 0.48631  |
| H    | 3.72939   | 0.22090  | 1.41693  | C | -1.95657 | -2.09822 | 0.33256  |
| H    | 0.25678   | -3.19096 | -2.78380 | O | -2.55720 | -2.76410 | -0.50300 |
| H    | 3.72797   | -4.66087 | 0.88523  | N | -1.09495 | -2.68232 | 1.24193  |
| H    | 2.95550   | -5.72031 | -0.22688 | C | -0.29743 | -2.05829 | 2.21009  |
| H    | 0.66073   | 1.84211  | 1.05853  | O | 0.48005  | -2.70363 | 2.90909  |
| H    | -2.53653  | 3.67448  | -3.21476 | C | -0.48917 | -0.61806 | 2.27824  |
| H    | -1.01013  | 2.88934  | -2.73558 | C | 0.32507  | 0.15278  | 3.27773  |
| H    | -3.17689  | 1.49706  | -2.86244 | C | -1.34865 | -0.01880 | 1.41862  |
| H    | -3.96378  | 3.28293  | -0.62169 | P | -6.73507 | 2.12880  | -1.24997 |
| H    | -3.51200  | 1.71275  | 0.98468  | O | -7.62219 | 2.74295  | -2.31141 |
| H    | -3.33664  | -0.51228 | -1.08436 | O | -6.70063 | 2.78615  | 0.11124  |
| H    | -1.27301  | 1.13197  | 1.69190  | O | -7.12290 | 0.54564  | -1.01707 |
| H    | -0.70672  | -5.21676 | 0.90014  | C | -7.02621 | -0.31834 | -2.15841 |
| H    | -3.21187  | -4.74465 | -1.47069 | C | -7.30675 | -1.74656 | -1.74436 |
| H    | -2.33997  | -5.89502 | -0.57933 | O | -6.25286 | -2.21406 | -0.87801 |
| H    | -4.84919  | 0.73401  | 0.30440  | C | -8.63520 | -1.94390 | -0.98402 |
| H    | -7.82444  | 0.20333  | -2.80104 | O | -9.21330 | -3.15846 | -1.46750 |
| H    | -6.07858  | -0.05385 | -2.53166 | C | -8.17257 | -2.07017 | 0.46498  |
| H    | -7.42163  | -2.14222 | -2.48768 | C | -6.83760 | -2.79053 | 0.28304  |
| H    | -9.32345  | -0.82095 | -0.91731 | N | -5.92135 | -2.64284 | 1.40870  |
| H    | -7.88392  | -0.70178 | 1.02144  | C | -5.17946 | -3.74585 | 1.85090  |
| H    | -6.96593  | -3.54509 | 0.37062  | O | -5.29965 | -4.87300 | 1.40462  |
| H    | -4.76349  | 0.13065  | 3.40890  | N | -4.27881 | -3.42764 | 2.85868  |
| H    | -3.47573  | -3.88741 | 3.13551  | C | -4.06257 | -2.16964 | 3.41339  |
| H    | -8.77060  | -2.22296 | 1.36261  | O | -3.22128 | -1.96610 | 4.27574  |
| H    | -10.00717 | -3.03036 | -0.57415 | C | -4.92951 | -1.14361 | 2.81740  |
| H    | 10.82383  | -0.01839 | 0.46925  | N | -5.78237 | -1.38426 | 1.88172  |
| Na   | 5.67522   | 2.46027  | 4.13130  | H | 9.98140  | 2.00477  | -0.49763 |
| Na   | -1.34730  | 4.84653  | 2.65743  | H | 10.09768 | 0.79678  | -1.80382 |
| Na   | -8.07426  | 4.84649  | -0.78122 | H | 7.93910  | 2.05567  | -1.71445 |
| XATX |           |          |          | H | 7.88071  | 1.63003  | 1.04645  |
| O    | 9.83257   | 0.01039  | 0.11733  | H | 7.54159  | -0.76982 | 0.78276  |
| C    | 9.60445   | 1.03211  | -0.84907 | H | 5.57965  | -0.04203 | -1.44418 |
| C    | 8.11120   | 1.16778  | -1.09430 | H | 7.60946  | -4.65362 | -0.05721 |
| O    | 7.62428   | 0.00166  | -1.79311 | H | 4.59068  | -4.10803 | -2.97881 |
| C    | 7.28003   | 1.27782  | 0.20338  | H | 5.85601  | -0.18490 | 0.99471  |
| O    | 6.20011   | 2.20128  | -0.05032 | H | 3.80612  | 4.77693  | -1.22851 |
| C    | 6.75000   | -0.13904 | 0.37615  | H | 4.78949  | 3.32324  | -1.53613 |
| C    | 6.49917   | -0.50808 | -1.08258 | H | 2.32798  | 3.28149  | -2.21704 |
| N    | 6.35211   | -1.93832 | -1.33460 | H | 1.74614  | 4.04845  | 0.44915  |
| C    | 5.40392   | -2.36742 | -2.27660 | H | 2.33001  | 1.83708  | 1.29832  |
| O    | 4.74163   | -1.59029 | -2.94531 | H | 1.00883  | 0.74779  | -1.24859 |
| N    | 5.30337   | -3.74635 | -2.35141 | H | 3.71359  | 0.08947  | 1.35706  |
| C    | 5.98174   | -4.66394 | -1.54841 | H | 0.22937  | -3.40641 | -2.77151 |
| O    | 5.75296   | -5.86284 | -1.59040 | H | 3.77737  | -4.78518 | 0.85910  |
| C    | 6.98032   | -4.02077 | -0.67383 | H | 3.02722  | -5.86574 | -0.24308 |
| N    | 7.13785   | -2.74718 | -0.59257 | H | 0.56077  | 1.67237  | 1.01374  |
| P    | 5.37007   | 2.79970  | 1.23176  | H | -2.61131 | 3.35582  | -3.31587 |
| O    | 6.27208   | 3.65537  | 2.09914  | H | -1.07960 | 2.60835  | -2.79521 |
| O    | 4.64394   | 1.69698  | 1.99019  | H | -3.25061 | 1.19981  | -2.87796 |
| O    | 4.31283   | 3.76002  | 0.45122  | H | -3.97678 | 3.01935  | -0.62876 |
| C    | 3.96810   | 3.73239  | -0.94294 | H | -3.64888 | 1.42915  | 0.97127  |
| C    | 2.68924   | 2.96232  | -1.23069 | H | -3.38057 | -0.77023 | -1.11135 |
| O    | 2.94353   | 1.54422  | -1.26319 | H | -1.48920 | 1.05873  | 1.38380  |
| C    | 1.55980   | 3.18322  | -0.19228 | H | -0.97716 | -3.68409 | 1.13190  |
| O    | 0.34685   | 3.37629  | -0.94203 | H | -4.93303 | 0.44282  | 0.21393  |
| C    | 1.52760   | 1.85797  | 0.55525  | H | -7.75529 | -0.01561 | -2.92088 |
| C    | 1.86470   | 0.89477  | -0.58105 | H | -6.01905 | -0.25500 | -2.58575 |
|      |           |          |          | H | -7.32258 | -2.36231 | -2.65269 |

|    |           |          |          |
|----|-----------|----------|----------|
| H  | -9.31655  | -1.09783 | -1.13425 |
| H  | -7.99498  | -1.07810 | 0.88488  |
| H  | -6.98034  | -3.86397 | 0.14633  |
| H  | -4.84299  | -0.12174 | 3.17026  |
| H  | -3.71070  | -4.19704 | 3.20068  |
| H  | -8.87266  | -2.62917 | 1.09288  |
| H  | -10.01501 | -3.31994 | -0.94446 |
| H  | 10.78743  | -0.02538 | 0.27900  |
| H  | 0.07476   | 1.21783  | 3.24562  |
| H  | 0.14746   | -0.22298 | 4.29300  |
| H  | 1.39777   | 0.03913  | 3.07332  |
| Na | 5.83861   | 2.24523  | 4.03571  |
| Na | -1.51614  | 4.78114  | 2.51746  |
| Na | -8.27481  | 4.49836  | -0.70648 |

XCAX

|   |          |          |          |
|---|----------|----------|----------|
| O | -9.85940 | 0.07286  | 0.10011  |
| C | -9.64620 | -0.98459 | -0.83095 |
| C | -8.15573 | -1.13331 | -1.08178 |
| O | -7.67662 | 0.01226  | -1.82230 |
| C | -7.31847 | -1.20098 | 0.21838  |
| O | -6.26188 | -2.16688 | 0.01403  |
| C | -6.75314 | 0.20679  | 0.31698  |
| C | -6.51558 | 0.50259  | -1.16144 |
| N | -6.29942 | 1.91069  | -1.47284 |
| C | -5.37374 | 2.26323  | -2.46681 |
| O | -4.74255 | 1.45460  | -3.12461 |
| N | -5.24044 | 3.63633  | -2.62532 |
| C | -5.90705 | 4.63060  | -1.90998 |
| O | -5.73720 | 5.82082  | -2.12097 |
| C | -6.80640 | 4.06531  | -0.89443 |
| N | -6.99244 | 2.80181  | -0.72276 |
| P | -5.48166 | -2.73710 | 1.34104  |
| O | -6.42460 | -3.55637 | 2.20084  |
| O | -4.77242 | -1.61740 | 2.09120  |
| O | -4.40148 | -3.73251 | 0.64022  |
| C | -4.01974 | -3.79543 | -0.74261 |
| C | -2.73264 | -3.04376 | -1.04502 |
| O | -2.99211 | -1.63570 | -1.15566 |
| C | -1.61750 | -3.20117 | 0.02208  |
| O | -0.39252 | -3.43777 | -0.69414 |
| C | -1.60025 | -1.83325 | 0.69899  |
| C | -1.91429 | -0.94382 | -0.50275 |
| N | -2.34882 | 0.41681  | -0.23313 |
| C | -1.81064 | 1.49175  | -1.00881 |
| O | -0.98590 | 1.24742  | -1.89237 |
| N | -2.23022 | 2.75713  | -0.71885 |
| C | -3.08213 | 2.96955  | 0.27758  |
| N | -3.47482 | 4.24911  | 0.49723  |
| C | -3.64987 | 1.91882  | 1.06058  |
| C | -3.25900 | 0.65339  | 0.75500  |
| P | 0.95519  | -3.92701 | 0.10507  |
| O | 0.75660  | -5.30241 | 0.71042  |
| O | 1.46175  | -2.87086 | 1.07423  |
| O | 1.92578  | -4.09654 | -1.19519 |
| C | 2.02535  | -3.13253 | -2.25590 |
| C | 2.80971  | -1.87319 | -1.91295 |
| O | 1.98507  | -0.92114 | -1.24236 |
| C | 4.04638  | -2.09611 | -1.01443 |
| O | 5.19584  | -2.06275 | -1.87430 |
| C | 3.95847  | -0.96765 | 0.03645  |
| C | 2.87164  | -0.05415 | -0.53219 |
| N | 2.08976  | 0.70717  | 0.41374  |
| C | 1.28409  | 0.20882  | 1.42063  |
| N | 0.51965  | 1.11972  | 1.98299  |
| C | 0.82510  | 2.28486  | 1.28953  |
| C | 0.40371  | 3.62554  | 1.42069  |
| N | -0.48841 | 4.03747  | 2.35743  |
| N | 0.93252  | 4.55625  | 0.60396  |
| C | 1.84062  | 4.17419  | -0.30697 |
| N | 2.33382  | 2.95115  | -0.53390 |
| C | 1.79930  | 2.05215  | 0.31242  |
| P | 6.69984  | -2.26780 | -1.24323 |
| O | 7.54882  | -2.90569 | -2.32167 |
| O | 6.64678  | -2.94184 | 0.10932  |
| O | 7.16101  | -0.70814 | -0.99279 |
| C | 7.13829  | 0.16472  | -2.13200 |
| C | 7.41897  | 1.58535  | -1.69014 |
| O | 6.32059  | 2.06431  | -0.88896 |
| C | 8.69608  | 1.74993  | -0.83986 |
| O | 9.32564  | 2.96043  | -1.26492 |

|    |           |          |          |
|----|-----------|----------|----------|
| C  | 8.13903   | 1.86454  | 0.57936  |
| C  | 6.84577   | 2.62841  | 0.31044  |
| N  | 5.83645   | 2.53052  | 1.35838  |
| C  | 5.02043   | 3.64431  | 1.61444  |
| O  | 5.09973   | 4.69632  | 1.00500  |
| N  | 4.12143   | 3.44784  | 2.65456  |
| C  | 3.89748   | 2.25186  | 3.32278  |
| O  | 3.04139   | 2.12484  | 4.18296  |
| C  | 4.82466   | 1.18739  | 2.89620  |
| N  | 5.71101   | 1.33331  | 1.97294  |
| H  | -10.02348 | -1.94213 | -0.44078 |
| H  | -10.14766 | -0.78144 | -1.78873 |
| H  | -7.98611  | -2.04120 | -1.67298 |
| H  | -7.92706  | -1.49271 | 1.07836  |
| H  | -7.52295  | 0.87703  | 0.70200  |
| H  | -5.62448  | -0.02099 | -1.51867 |
| H  | -7.37174  | 4.74662  | -0.26745 |
| H  | -4.57360  | 3.93206  | -3.33192 |
| H  | -5.85336  | 0.25645  | 0.92468  |
| H  | -3.85740  | -4.85656 | -0.95847 |
| H  | -4.82336  | -3.41911 | -1.38091 |
| H  | -2.35207  | -3.41854 | -2.00506 |
| H  | -1.81208  | -4.02821 | 0.71019  |
| H  | -2.40919  | -1.79315 | 1.43322  |
| H  | -1.05045  | -0.86781 | -1.16380 |
| H  | -3.67783  | -0.21462 | 1.25788  |
| H  | -4.38226  | 2.11055  | 1.83492  |
| H  | -2.98342  | 4.99052  | 0.01614  |
| H  | -3.98478  | 4.49019  | 1.33481  |
| H  | -0.63962  | -1.61737 | 1.16197  |
| H  | 2.55843   | -3.65185 | -3.05737 |
| H  | 1.02597   | -2.85981 | -2.60915 |
| H  | 3.15870   | -1.43721 | -2.86196 |
| H  | 4.00826   | -3.06780 | -0.52298 |
| H  | 3.62343   | -1.38917 | 0.98661  |
| H  | 3.31095   | 0.68318  | -1.21666 |
| H  | 1.31089   | -0.85025 | 1.64593  |
| H  | 2.22731   | 4.96792  | -0.94313 |
| H  | -1.07095  | 3.33073  | 2.78773  |
| H  | -0.92536  | 4.93698  | 2.20282  |
| H  | 4.90401   | -0.43976 | 0.17154  |
| H  | 7.90121   | -0.14732 | -2.85614 |
| H  | 6.15341   | 0.12304  | -2.61134 |
| H  | 7.50743   | 2.20743  | -2.59002 |
| H  | 9.37236   | 0.89441  | -0.95485 |
| H  | 7.90786   | 0.87171  | 0.96937  |
| H  | 7.03972   | 3.69366  | 0.17249  |
| H  | 4.74445   | 0.21491  | 3.36971  |
| H  | 3.50618   | 4.23002  | 2.85864  |
| H  | 8.81004   | 2.39399  | 1.26223  |
| H  | 10.09443  | 3.09848  | -0.68861 |
| H  | -10.81152 | 0.11468  | 0.27587  |
| Na | -5.99978  | -2.15313 | 4.12867  |
| Na | 1.46819   | -4.47522 | 2.89396  |
| Na | 8.06610   | -4.75381 | -0.76317 |

XCCX

|   |          |          |          |
|---|----------|----------|----------|
| O | -9.87828 | 0.35066  | 0.12502  |
| C | -9.69104 | -0.63156 | -0.89000 |
| C | -8.20415 | -0.81277 | -1.14360 |
| O | -7.67220 | 0.37181  | -1.77338 |
| C | -7.37989 | -1.02643 | 0.14553  |
| O | -6.33687 | -1.97952 | -0.15984 |
| C | -6.79055 | 0.36016  | 0.39417  |
| C | -6.51129 | 0.77043  | -1.04510 |
| N | -6.24619 | 2.18125  | -1.27210 |
| C | -5.32012 | 2.53386  | -2.26689 |
| O | -4.72204 | 1.72303  | -2.95331 |
| N | -5.13525 | 3.90186  | -2.39332 |
| C | -5.76588 | 4.89552  | -1.65282 |
| O | -5.55450 | 6.08535  | -1.82597 |
| C | -6.69075 | 4.33246  | -0.65316 |
| N | -6.90857 | 3.07065  | -0.49620 |
| P | -5.51662 | -2.66074 | 1.08755  |
| O | -6.42977 | -3.55312 | 1.90539  |
| O | -4.78073 | -1.60838 | 1.90563  |
| O | -4.47187 | -3.59865 | 0.26405  |
| C | -4.07670 | -3.49949 | -1.11413 |
| C | -2.75941 | -2.76127 | -1.31333 |
| O | -2.98416 | -1.34145 | -1.28985 |
| C | -1.69138 | -3.05813 | -0.22931 |



|    |           |          |          |
|----|-----------|----------|----------|
| C  | 8.10455   | 1.73565  | 0.59873  |
| C  | 6.80617   | 2.50218  | 0.36729  |
| N  | 5.80966   | 2.37073  | 1.42442  |
| C  | 4.98529   | 3.47010  | 1.70622  |
| O  | 5.02508   | 4.52424  | 1.09482  |
| N  | 4.12722   | 3.25857  | 2.77686  |
| C  | 3.89959   | 2.04400  | 3.41166  |
| O  | 3.04715   | 1.88851  | 4.27068  |
| C  | 4.82740   | 0.99687  | 2.95647  |
| N  | 5.70226   | 1.16393  | 2.02458  |
| H  | 4.75976   | 0.01508  | 3.41236  |
| H  | -10.10600 | -1.82229 | -0.47871 |
| H  | -10.20231 | -0.61572 | -1.78803 |
| H  | -8.07859  | -1.93906 | -1.72396 |
| H  | -7.98664  | -1.49235 | 1.04063  |
| H  | -7.53884  | 0.88349  | 0.74862  |
| H  | -5.65775  | 0.03201  | -1.50459 |
| H  | -4.54065  | 4.01737  | -3.18797 |
| H  | -5.88099  | 0.22168  | 0.94369  |
| H  | -3.95541  | -4.80865 | -1.17148 |
| H  | -4.89683  | -3.33584 | -1.52003 |
| H  | -2.41234  | -3.34904 | -2.11454 |
| H  | -1.94081  | -4.07342 | 0.59271  |
| H  | -2.46316  | -1.85557 | 1.38762  |
| H  | -1.08465  | -0.86683 | -1.17566 |
| H  | -3.70623  | -0.27302 | 1.25998  |
| H  | -4.40485  | 2.02626  | 1.92312  |
| H  | -2.94699  | 4.96211  | 0.25506  |
| H  | -3.94941  | 4.42016  | 1.54314  |
| H  | -0.69105  | -1.70987 | 1.11626  |
| H  | 2.50600   | -3.76780 | -3.06137 |
| H  | 0.98023   | -2.95266 | -2.63324 |
| H  | 3.13053   | -1.56339 | -2.84244 |
| H  | 3.98067   | -3.26532 | -0.57124 |
| H  | 3.48413   | -1.67012 | 1.00596  |
| H  | 3.34920   | 0.50669  | -1.12024 |
| H  | 1.26086   | -1.00170 | 1.70992  |
| H  | 0.80330   | 5.33569  | 0.68528  |
| H  | 3.37429   | 4.73075  | -1.58885 |
| H  | 2.48526   | 5.92778  | -0.78146 |
| H  | 4.84093   | -0.71354 | 0.32978  |
| H  | 7.82485   | -0.22154 | -2.84637 |
| H  | 6.08026   | 0.04570  | -2.57708 |
| H  | 7.43134   | 2.13229  | -2.56229 |
| H  | 9.32741   | 0.81868  | -0.97649 |
| H  | 7.88335   | 0.73124  | 0.96339  |
| H  | 6.99634   | 3.57189  | 0.26220  |
| H  | 3.51509   | 4.03526  | 3.00930  |
| H  | 8.78175   | 2.24964  | 1.28726  |
| H  | 10.02523  | 3.02656  | -0.66090 |
| H  | -10.83345 | 0.23100  | 0.30746  |
| H  | -7.35149  | 4.78643  | -0.12363 |
| Na | -6.06635  | -2.25235 | 4.03380  |
| Na | 1.08571   | -4.63113 | 2.87997  |
| Na | 8.05464   | -4.83528 | -0.78109 |

XCTX

|   |         |          |          |
|---|---------|----------|----------|
| O | 9.82177 | -0.20335 | 0.14732  |
| C | 9.64191 | 0.83821  | -0.80831 |
| C | 8.15904 | 1.00146  | -1.09375 |
| O | 7.67904 | -0.15328 | -1.81815 |
| C | 7.29532 | 1.10984  | 0.18537  |
| O | 6.25242 | 2.07747  | -0.06807 |
| C | 6.71539 | -0.29117 | 0.30892  |
| C | 6.50262 | -0.61981 | -1.16554 |
| N | 6.28419 | -2.03131 | -1.45440 |
| C | 5.35029 | -2.40128 | -2.43551 |
| O | 4.70413 | -1.60529 | -3.09417 |
| N | 5.23391 | -3.77737 | -2.58520 |
| C | 5.90731 | -4.76047 | -1.85955 |
| O | 5.75658 | -5.95355 | -2.06800 |
| C | 6.78202 | -4.17677 | -0.83257 |
| N | 6.96091 | -2.91018 | -0.67590 |
| P | 5.42007 | 2.67023  | 1.21715  |
| O | 6.32735 | 3.50537  | 2.09927  |
| O | 4.67840 | 1.56576  | 1.95806  |
| O | 4.38101 | 3.66004  | 0.44976  |
| C | 3.99886 | 3.63103  | -0.93436 |
| C | 2.71723 | 2.85651  | -1.19887 |
| O | 2.98197 | 1.44498  | -1.24606 |
| C | 1.59682 | 3.06194  | -0.14289 |

|   |          |          |          |
|---|----------|----------|----------|
| O | 0.38694  | 3.33314  | -0.87435 |
| C | 1.52619  | 1.70686  | 0.54737  |
| C | 1.87283  | 0.78180  | -0.61939 |
| N | 2.27717  | -0.57350 | -0.27463 |
| C | 1.76813  | -1.68687 | -1.02333 |
| O | 0.94252  | -1.48587 | -1.91699 |
| N | 2.21412  | -2.93328 | -0.69093 |
| C | 3.08446  | -3.09772 | 0.30073  |
| N | 3.54315  | -4.35207 | 0.52753  |
| C | 3.60028  | -2.01079 | 1.07331  |
| C | 3.18799  | -0.76509 | 0.72489  |
| P | -0.94671 | 3.88672  | -0.09478 |
| O | -0.73220 | 5.29436  | 0.42339  |
| O | -1.45240 | 2.89744  | 0.94417  |
| O | -1.92925 | 3.98269  | -1.39179 |
| C | -2.06248 | 2.94477  | -2.37603 |
| C | -2.85896 | 1.72400  | -1.93216 |
| O | -2.03222 | 0.78121  | -1.25519 |
| C | -4.05063 | 2.01537  | -0.99313 |
| O | -5.22570 | 2.01388  | -1.81682 |
| C | -3.95980 | 0.91096  | 0.08945  |
| C | -2.92257 | -0.04676 | -0.49602 |
| N | -2.10196 | -0.82181 | 0.42242  |
| C | -1.94335 | -2.18553 | 0.15493  |
| O | -2.54951 | -2.78707 | -0.72416 |
| N | -1.07456 | -2.83447 | 1.00785  |
| C | -0.28325 | -2.27866 | 2.01543  |
| O | 0.46953  | -2.98940 | 2.67719  |
| C | -0.43297 | -0.83330 | 2.15962  |
| C | 0.41603  | -0.13566 | 3.18265  |
| P | -1.31741 | -0.18122 | 1.36721  |
| C | -6.72562 | 2.12613  | -1.15901 |
| O | -7.61275 | 2.78005  | -2.19661 |
| O | -6.68810 | 2.73420  | 0.22461  |
| O | -7.11677 | 0.53627  | -0.98545 |
| C | -7.02735 | -0.28210 | -2.16105 |
| C | -7.31621 | -1.72485 | -1.80635 |
| O | -6.26134 | -2.23792 | -0.96786 |
| C | -8.63880 | -1.94205 | -1.04357 |
| O | -9.22321 | -3.14116 | -1.55649 |
| C | -8.16419 | -2.11121 | 0.39903  |
| C | -6.84616 | -2.84889 | 0.17731  |
| N | -5.90836 | -2.77367 | 1.29057  |
| C | -5.15066 | -3.90307 | 1.62811  |
| O | -5.27035 | -4.99060 | 1.09258  |
| N | -4.23961 | -3.66307 | 2.64788  |
| C | -4.02021 | -2.45184 | 3.29671  |
| O | -3.17512 | -2.31593 | 4.16855  |
| C | -4.88457 | -1.38037 | 2.78183  |
| N | -5.74922 | -1.54911 | 1.84135  |
| H | 10.02402 | 1.79828  | -0.42922 |
| H | 10.16023 | 0.60954  | -1.75128 |
| H | 8.01524  | 1.89818  | -1.70842 |
| H | 7.88703  | 1.41974  | 1.05099  |
| H | 7.47141  | -0.95827 | 0.72525  |
| H | 5.62258  | -0.09736 | -1.55032 |
| H | 7.33634  | -4.84660 | -0.18374 |
| H | 4.56994  | -4.08498 | -3.28941 |
| H | 5.80200  | -0.31819 | 0.89798  |
| H | 3.82838  | 4.67593  | -1.21311 |
| H | 4.80786  | 3.22547  | -1.54747 |
| H | 2.33483  | 3.18319  | -2.17559 |
| H | 1.81385  | 3.88955  | 0.53756  |
| H | 2.29964  | 1.66260  | 1.31744  |
| H | 1.03327  | 0.69105  | -1.31033 |
| H | 3.59421  | 0.12451  | 1.19924  |
| H | 4.33217  | -2.16109 | 1.85722  |
| H | 3.08664  | -5.12226 | 0.05725  |
| H | 4.06209  | -4.55947 | 1.36880  |
| H | 0.54516  | 1.52326  | 0.97331  |
| H | -2.60065 | 3.41444  | -3.20402 |
| H | -1.07370 | 2.63027  | -2.72479 |
| H | -3.26244 | 1.25189  | -2.84158 |
| H | -3.95659 | 2.99571  | -0.52687 |
| H | -3.59230 | 1.35580  | 1.01666  |
| H | -3.41233 | -0.77023 | -1.15278 |
| H | -1.45216 | 0.89672  | 1.40001  |
| H | -0.96322 | -3.82785 | 0.83560  |
| H | -4.91187 | 0.40882  | 0.26774  |
| H | -7.75533 | 0.05670  | -2.90918 |
| H | -6.02044 | -0.20841 | -2.58716 |

|    |           |          |          |
|----|-----------|----------|----------|
| H  | -7.34387  | -2.30090 | -2.74004 |
| H  | -9.31973  | -1.09074 | -1.16322 |
| H  | -7.96622  | -1.13321 | 0.84203  |
| H  | -7.01640  | -3.91155 | -0.00454 |
| H  | -4.78321  | -0.38543 | 3.20138  |
| H  | -3.66610  | -4.45527 | 2.92235  |
| H  | -8.86659  | -2.67591 | 1.01918  |
| H  | -10.02036 | -3.31699 | -1.03105 |
| H  | 10.76933  | -0.25345 | 0.34423  |
| H  | 0.19427   | 0.93581  | 3.20646  |
| H  | 0.24349   | -0.55651 | 4.18107  |
| H  | 1.48159   | -0.26821 | 2.95483  |
| Na | 5.86349   | 2.10835  | 4.02463  |
| Na | -1.43197  | 4.60074  | 2.66270  |
| Na | -8.24853  | 4.49065  | -0.54542 |

XGAX

|   |          |          |          |
|---|----------|----------|----------|
| O | 9.82725  | 0.10236  | 0.31938  |
| C | 9.64031  | 1.11891  | -0.66116 |
| C | 8.15652  | 1.27254  | -0.95001 |
| O | 7.67317  | 0.10693  | -1.65188 |
| C | 7.28934  | 1.40656  | 0.32145  |
| O | 6.22904  | 2.34083  | 0.02450  |
| C | 6.73790  | -0.00119 | 0.49479  |
| C | 6.52618  | -0.38706 | -0.96555 |
| N | 6.37860  | -1.82076 | -1.20079 |
| C | 5.46532  | -2.25344 | -2.16969 |
| O | 4.85326  | -1.48380 | -2.89332 |
| N | 5.33661  | -3.63312 | -2.21485 |
| C | 5.98661  | -4.55340 | -1.38845 |
| O | 5.78400  | -5.75453 | -1.46039 |
| C | 6.93953  | -3.90606 | -0.47357 |
| N | 7.11168  | -2.63217 | -0.40619 |
| P | 5.38040  | 2.96748  | 1.28094  |
| O | 6.26958  | 3.84529  | 2.14004  |
| O | 4.64933  | 1.87896  | 2.05397  |
| O | 4.33167  | 3.90879  | 0.46680  |
| C | 4.00672  | 3.86654  | -0.93202 |
| C | 2.71850  | 3.11148  | -1.22459 |
| O | 2.96119  | 1.69195  | -1.25909 |
| C | 1.59700  | 3.34014  | -0.18161 |
| O | 0.37276  | 3.52442  | -0.91403 |
| C | 1.58068  | 2.02196  | 0.58473  |
| C | 1.89363  | 1.04970  | -0.54961 |
| N | 2.32383  | -0.26196 | -0.13998 |
| C | 3.21461  | -0.56009 | 0.87972  |
| N | 3.43181  | -1.84537 | 1.01610  |
| C | 2.65075  | -2.44210 | 0.02692  |
| C | 2.41747  | -3.82105 | -0.27363 |
| O | 2.87246  | -4.83461 | 0.25694  |
| N | 1.53372  | -3.94381 | -1.37528 |
| C | 0.84664  | -2.90508 | -1.97228 |
| N | -0.03487 | -3.23745 | -2.95952 |
| N | 1.04100  | -1.63746 | -1.66892 |
| C | 1.96596  | -1.46375 | -0.69697 |
| P | -0.96029 | 4.09445  | -0.14141 |
| O | -0.73429 | 5.50836  | 0.35492  |
| O | -1.46928 | 3.12155  | 0.90980  |
| O | -1.94296 | 4.17701  | -1.43993 |
| C | -2.07775 | 3.12459  | -2.40787 |
| C | -2.86299 | 1.90790  | -1.93718 |
| O | -2.02503 | 0.99807  | -1.22368 |
| C | -4.07018 | 2.21494  | -1.01975 |
| O | -5.24122 | 2.13006  | -1.84691 |
| C | -3.95859 | 1.16960  | 0.10989  |
| C | -2.89851 | 0.20353  | -0.41929 |
| N | -2.09743 | -0.48425 | 0.56658  |
| C | -1.27995 | 0.07189  | 1.53762  |
| N | -0.51480 | -0.80680 | 2.15192  |
| C | -0.85094 | -2.01193 | 1.54911  |
| C | -0.37761 | -3.31411 | 1.73650  |
| N | 0.60679  | -3.63190 | 2.62414  |
| N | -0.90497 | -4.28839 | 0.96324  |
| C | -1.81722 | -3.97065 | 0.03431  |
| N | -2.31448 | -2.76572 | -0.26618 |
| C | -1.80860 | -1.82879 | 0.54660  |
| P | -6.74103 | 2.28448  | -1.19393 |
| O | -7.62978 | 2.87652  | -2.26653 |
| O | -6.69371 | 2.97659  | 0.14957  |
| O | -7.13625 | 0.71026  | -0.91880 |
| C | -7.06069 | -0.18467 | -2.03802 |

|    |          |          |          |
|----|----------|----------|----------|
| C  | -7.32208 | -1.60390 | -1.57902 |
| O  | -6.24181 | -2.04567 | -0.73286 |
| C  | -8.62356 | -1.78574 | -0.77161 |
| O  | -9.20304 | -3.02358 | -1.18925 |
| C  | -8.11529 | -1.85148 | 0.66833  |
| C  | -6.79082 | -2.58251 | 0.46831  |
| N  | -5.82522 | -2.41152 | 1.54842  |
| C  | -4.98658 | -3.48335 | 1.88607  |
| O  | -5.02024 | -4.57175 | 1.33903  |
| N  | -4.12139 | -3.19557 | 2.93162  |
| C  | -3.94164 | -1.95528 | 3.53350  |
| O  | -3.11036 | -1.76227 | 4.40482  |
| C  | -4.86887 | -0.93995 | 3.01021  |
| N  | -5.72993 | -1.17058 | 2.07940  |
| H  | 10.02046 | 2.08939  | -0.30708 |
| H  | 10.15701 | 0.86894  | -1.59964 |
| H  | 8.01528  | 2.15663  | -1.58323 |
| H  | 7.86983  | 1.76160  | 1.17743  |
| H  | 7.50994  | -0.63504 | 0.93266  |
| H  | 5.61907  | 0.07751  | -1.35939 |
| H  | 7.53268  | -4.53368 | 0.18289  |
| H  | 4.66368  | -3.99560 | -2.88367 |
| H  | 5.82502  | -0.03017 | 1.08586  |
| H  | 3.86782  | 4.90948  | -1.23519 |
| H  | 4.82877  | 3.43309  | -1.50687 |
| H  | 2.35986  | 3.43622  | -2.21012 |
| H  | 1.78829  | 4.21182  | 0.44950  |
| H  | 2.40063  | 2.01393  | 1.30867  |
| H  | 1.02490  | 0.90699  | -1.20118 |
| H  | 3.67833  | 0.23581  | 1.45175  |
| H  | 1.30167  | -4.89914 | -1.62547 |
| H  | -0.68608 | -2.49987 | -3.19897 |
| H  | -0.44813 | -4.16138 | -2.93855 |
| H  | 0.62399  | 1.83780  | 1.06787  |
| H  | -2.62610 | 3.57725  | -3.23882 |
| H  | -1.08987 | 2.81087  | -2.75999 |
| H  | -3.24953 | 1.40299  | -2.83589 |
| H  | -4.00998 | 3.22108  | -0.60575 |
| H  | -3.58869 | 1.66131  | 1.01180  |
| H  | -3.36299 | -0.58393 | -1.02656 |
| H  | -1.30033 | 1.14251  | 1.69731  |
| H  | -2.18886 | -4.80246 | -0.56046 |
| H  | 1.18840  | -2.85780 | 2.92370  |
| H  | 1.12388  | -4.47646 | 2.40329  |
| H  | -4.90156 | 0.66154  | 0.31709  |
| H  | -7.80922 | 0.09361  | -2.79076 |
| H  | -6.06384 | -0.12763 | -2.48997 |
| H  | -7.36373 | -2.24213 | -2.47095 |
| H  | -9.31904 | -0.95302 | -0.93125 |
| H  | -7.92667 | -0.84329 | 1.04144  |
| H  | -6.94388 | -3.65828 | 0.36541  |
| H  | -4.81747 | 0.06596  | 3.41237  |
| H  | -3.49373 | -3.94703 | 3.20241  |
| H  | -8.79533 | -2.38426 | 1.33953  |
| H  | -9.98716 | -3.17130 | -0.63637 |
| H  | 10.77671 | 0.05429  | 0.50740  |
| Na | 5.83235  | 2.46970  | 4.09848  |
| Na | -1.42523 | 4.84317  | 2.60890  |
| Na | -8.17743 | 4.73449  | -0.73065 |

XGCX

|   |         |          |          |
|---|---------|----------|----------|
| O | 9.81689 | 0.04859  | 0.34101  |
| C | 9.62501 | 1.04426  | -0.65982 |
| C | 8.14063 | 1.18347  | -0.95310 |
| O | 7.66500 | 0.00181  | -1.63343 |
| C | 7.27168 | 1.33624  | 0.31506  |
| O | 6.20630 | 2.25849  | 0.00133  |
| C | 6.72723 | -0.07141 | 0.51333  |
| C | 6.51818 | -0.48286 | -0.94024 |
| N | 6.37151 | -1.91841 | -1.15101 |
| C | 5.45541 | -2.37816 | -2.10352 |
| O | 4.82050 | -1.63784 | -2.83671 |
| N | 5.34685 | -3.76036 | -2.13362 |
| C | 6.00380 | -4.66318 | -1.29747 |
| O | 5.80377 | -5.86615 | -1.34225 |
| C | 6.96895 | -3.99397 | -0.41242 |
| N | 7.12835 | -2.71675 | -0.36229 |
| P | 5.34430 | 2.89620  | 1.24350  |
| O | 6.22092 | 3.79557  | 2.09317  |
| O | 4.61767 | 1.81414  | 2.02942  |
| O | 4.29244 | 3.81477  | 0.40745  |



|    |          |          |          |
|----|----------|----------|----------|
| C  | -1.79385 | -1.74256 | 0.56760  |
| P  | -6.68439 | 2.37346  | -1.23048 |
| O  | -7.56347 | 2.94816  | -2.32049 |
| O  | -6.62787 | 3.10255  | 0.09289  |
| O  | -7.10387 | 0.81396  | -0.91232 |
| C  | -7.06675 | -0.10605 | -2.01332 |
| C  | -7.34487 | -1.51104 | -1.51940 |
| O  | -6.25679 | -1.95591 | -0.68505 |
| C  | -8.63077 | -1.65195 | -0.68157 |
| O  | -9.22339 | -2.90300 | -1.03646 |
| C  | -8.09431 | -1.66140 | 0.74999  |
| C  | -6.78515 | -2.42010 | 0.55566  |
| N  | -5.78768 | -2.21019 | 1.60183  |
| C  | -4.93589 | -3.27304 | 1.94062  |
| O  | -4.94810 | -4.35696 | 1.38267  |
| N  | -4.07995 | -2.98638 | 2.99705  |
| C  | -3.89944 | -1.74053 | 3.58489  |
| O  | -3.05804 | -1.51890 | 4.44054  |
| C  | -4.83847 | -0.73670 | 3.05749  |
| N  | -5.70336 | -0.96998 | 2.13167  |
| H  | 10.09941 | 2.04075  | -0.32221 |
| H  | 10.22645 | 0.78782  | -1.58430 |
| H  | 8.10316  | 2.10539  | -1.61423 |
| H  | 7.93888  | 1.77566  | 1.15755  |
| H  | 7.53329  | -0.61589 | 0.96386  |
| H  | 5.67559  | 0.08137  | -1.35970 |
| H  | 4.67245  | -4.02194 | -2.80223 |
| H  | 5.85874  | 0.02311  | 1.08986  |
| H  | 3.94748  | 4.88679  | -1.35998 |
| H  | 4.89085  | 3.39120  | -1.58271 |
| H  | 2.41058  | 3.40211  | -2.25128 |
| H  | 1.88688  | 4.24203  | 0.40451  |
| H  | 2.45669  | 2.05221  | 1.29975  |
| H  | 1.07181  | 0.91783  | -1.19220 |
| H  | 3.72251  | 0.26815  | 1.46728  |
| H  | 1.30306  | -4.88146 | -1.54628 |
| H  | -0.70233 | -2.47893 | -3.08361 |
| H  | -0.62062 | -4.09932 | -2.62492 |
| H  | 0.67802  | 1.89339  | 1.05641  |
| H  | -2.54610 | 3.64607  | -3.25438 |
| H  | -1.01805 | 2.86722  | -2.76988 |
| H  | -3.18217 | 1.47423  | -2.85100 |
| H  | -3.97135 | 3.32230  | -0.66395 |
| H  | -3.50293 | 1.80358  | 0.98735  |
| H  | -3.34578 | -0.48356 | -1.01459 |
| H  | -1.27284 | 1.23479  | 1.70691  |
| H  | -0.69435 | -5.13297 | 1.07638  |
| H  | -3.07112 | -4.70602 | -1.43131 |
| H  | -2.19047 | -5.83964 | -0.53300 |
| H  | -4.84757 | 0.80607  | 0.34948  |
| H  | -7.82371 | 0.17142  | -2.75774 |
| H  | -6.07739 | -0.07811 | -2.48448 |
| H  | -7.41512 | -2.16661 | -2.39667 |
| H  | -9.32525 | -0.82253 | -0.86155 |
| H  | -7.88731 | -0.64022 | 1.07356  |
| H  | -6.95493 | -3.49731 | 0.51060  |
| H  | -3.45159 | -3.73649 | 3.26974  |
| H  | -8.76712 | -2.15496 | 1.45741  |
| H  | -9.99187 | -3.02844 | -0.45679 |
| H  | 10.81947 | 0.01777  | 0.54887  |
| H  | 7.54581  | -4.52601 | 0.26473  |
| H  | -4.79059 | 0.27022  | 3.45789  |
| Na | 5.72749  | 2.59658  | 4.07397  |
| Na | -1.28799 | 4.97255  | 2.57818  |
| Na | -8.07978 | 4.85984  | -0.84511 |

XGTX

|   |         |          |          |
|---|---------|----------|----------|
| O | 9.83258 | 0.00197  | 0.17153  |
| C | 9.62219 | 0.98872  | -0.83467 |
| C | 8.13186 | 1.13063  | -1.09475 |
| O | 7.63754 | -0.05697 | -1.75079 |
| C | 7.29613 | 1.29909  | 0.19371  |
| O | 6.22787 | 2.22582  | -0.09632 |
| C | 6.74925 | -0.10427 | 0.41691  |
| C | 6.50191 | -0.52552 | -1.02788 |
| N | 6.33396 | -1.96010 | -1.22634 |
| C | 5.38703 | -2.41667 | -2.15395 |
| O | 4.73121 | -1.66946 | -2.86143 |
| N | 5.27651 | -3.79724 | -2.18352 |
| C | 5.94598 | -4.69945 | -1.35677 |
| O | 5.74621 | -5.90239 | -1.40072 |

|   |          |          |          |
|---|----------|----------|----------|
| C | 6.92211  | -4.03113 | -0.47850 |
| N | 7.09447  | -2.75646 | -0.44117 |
| P | 5.39834  | 2.86989  | 1.16492  |
| O | 6.30236  | 3.75408  | 2.00125  |
| O | 4.67217  | 1.79503  | 1.96134  |
| O | 4.34247  | 3.80503  | 0.35222  |
| C | 3.98843  | 3.72228  | -1.03746 |
| C | 2.70283  | 2.94981  | -1.28805 |
| O | 2.94929  | 1.53027  | -1.27571 |
| C | 1.58290  | 3.21069  | -0.24877 |
| O | 0.36335  | 3.37664  | -0.99520 |
| C | 1.55442  | 1.91328  | 0.54608  |
| C | 1.87403  | 0.91040  | -0.56031 |
| N | 2.29601  | -0.39171 | -0.10398 |
| C | 3.22507  | -0.66688 | 0.88704  |
| N | 3.43675  | -1.95000 | 1.05508  |
| C | 2.60858  | -2.56932 | 0.12424  |
| C | 2.40313  | -3.95446 | -0.17255 |
| O | 2.86929  | -4.95952 | 0.36098  |
| N | 1.49943  | -4.09021 | -1.26330 |
| C | 0.79029  | -3.07441 | -1.86570 |
| N | -0.09503 | -3.42720 | -2.84407 |
| N | 0.97331  | -1.80640 | -1.57336 |
| C | 1.89400  | -1.61523 | -0.60132 |
| P | -0.97079 | 4.00177  | -0.27439 |
| O | -0.74140 | 5.44201  | 0.13593  |
| O | -1.49484 | 3.10096  | 0.83312  |
| O | -1.94314 | 4.00596  | -1.58258 |
| C | -2.06270 | 2.90814  | -2.50202 |
| C | -2.85275 | 1.71061  | -1.98895 |
| O | -2.02483 | 0.82356  | -1.24022 |
| C | -4.05922 | 2.05167  | -1.08637 |
| O | -5.22615 | 1.98175  | -1.91857 |
| C | -3.97459 | 1.02316  | 0.06673  |
| C | -2.91408 | 0.04148  | -0.43177 |
| N | -2.09506 | -0.64018 | 0.55932  |
| C | -1.94566 | -2.02249 | 0.44349  |
| O | -2.51735 | -2.71218 | -0.39411 |
| N | -1.11333 | -2.58002 | 1.39614  |
| O | -0.29390 | -1.92438 | 2.32637  |
| C | 0.48482  | -2.54442 | 3.04620  |
| C | -0.48212 | -0.48427 | 2.34493  |
| C | 0.33610  | 0.31968  | 3.31489  |
| C | -1.34506 | 0.08719  | 1.46953  |
| P | -6.72908 | 2.14021  | -1.27354 |
| O | -7.61054 | 2.73063  | -2.35289 |
| O | -6.68837 | 2.83619  | 0.06814  |
| O | -7.12545 | 0.56672  | -0.99651 |
| C | -7.01927 | -0.33486 | -2.10769 |
| C | -7.29587 | -1.75020 | -1.64823 |
| O | -6.24241 | -2.18786 | -0.76563 |
| C | -8.62472 | -1.92658 | -0.88402 |
| O | -9.19702 | -3.15961 | -1.32589 |
| C | -8.16390 | -2.00102 | 0.56934  |
| C | -6.82872 | -2.72636 | 0.41358  |
| N | -5.91280 | -2.54254 | 1.53407  |
| C | -5.16698 | -3.62966 | 2.00784  |
| O | -5.28161 | -4.76929 | 1.59272  |
| N | -4.26933 | -3.27968 | 3.00773  |
| C | -4.06005 | -2.00604 | 3.52888  |
| O | -3.22369 | -1.77590 | 4.38921  |
| C | -4.92735 | -1.00013 | 2.90059  |
| N | -5.77717 | -1.27018 | 1.97025  |
| H | 10.00750 | 1.96993  | -0.51779 |
| H | 10.11904 | 0.71176  | -1.77627 |
| H | 7.97269  | 1.99560  | -1.74987 |
| H | 7.89830  | 1.67477  | 1.02555  |
| H | 7.53149  | -0.72816 | 0.85109  |
| H | 5.59065  | -0.06063 | -1.41250 |
| H | 7.53542  | -4.64536 | 0.17215  |
| H | 4.58201  | -4.17176 | -2.82311 |
| H | 5.85107  | -0.11708 | 1.03081  |
| H | 3.83216  | 4.75552  | -1.36445 |
| H | 4.80344  | 3.28336  | -1.61812 |
| H | 2.33537  | 3.23823  | -2.28160 |
| H | 1.77497  | 4.09897  | 0.35853  |
| H | 2.36534  | 1.91480  | 1.28007  |
| H | 1.01026  | 0.74930  | -1.21389 |
| H | 3.71628  | 0.14376  | 1.41419  |
| H | 1.30308  | -5.05067 | -1.52546 |
| H | -0.76691 | -2.70205 | -3.06531 |









|    |           |          |          |
|----|-----------|----------|----------|
| H  | 0.02800   | -0.35650 | 2.88395  |
| H  | 0.29045   | -4.01647 | 2.64950  |
| H  | 0.77392   | -2.60576 | 3.52179  |
| H  | -5.00624  | 0.49911  | 0.27905  |
| H  | -7.88540  | 0.19299  | -2.84110 |
| H  | -6.15877  | -0.13924 | -2.53632 |
| H  | -7.58225  | -2.17138 | -2.62173 |
| H  | -9.46374  | -0.83965 | -1.02174 |
| H  | -8.08436  | -0.92948 | 0.95805  |
| H  | -7.25106  | -3.75272 | 0.13532  |
| H  | -4.84333  | -0.21950 | 3.20568  |
| H  | -3.93474  | -4.34791 | 3.09765  |
| H  | -9.04092  | -2.43312 | 1.16379  |
| H  | -10.26965 | -3.02814 | -0.85191 |
| H  | 10.32581  | -1.57121 | 0.91011  |
| Na | 7.04494   | 4.62923  | 3.06458  |
| Na | -1.15821  | 4.60766  | 2.74652  |
| Na | -8.12337  | 4.73254  | -0.63376 |

XXGX cation

|   |          |          |          |
|---|----------|----------|----------|
| O | 9.51192  | -1.20131 | 0.58484  |
| C | 9.82288  | -0.27941 | -0.45423 |
| C | 8.54906  | 0.38954  | -0.94783 |
| O | 7.76505  | -0.52244 | -1.74075 |
| C | 7.63425  | 0.88196  | 0.18581  |
| O | 7.08425  | 2.14773  | -0.22441 |
| C | 6.58227  | -0.22586 | 0.28735  |
| C | 6.48490  | -0.72243 | -1.15476 |
| N | 6.13369  | -2.14201 | -1.29811 |
| C | 5.23077  | -2.52495 | -2.29850 |
| O | 4.62428  | -1.73989 | -3.00892 |
| N | 5.04424  | -3.89873 | -2.37701 |
| C | 5.69603  | -4.87136 | -1.62286 |
| O | 5.48389  | -6.06535 | -1.76043 |
| C | 6.64766  | -4.27912 | -0.66919 |
| N | 6.85780  | -3.01285 | -0.55179 |
| P | 6.24273  | 3.05559  | 0.86296  |
| O | 6.58512  | 4.50689  | 0.60266  |
| O | 6.41688  | 2.52538  | 2.26808  |
| O | 4.68877  | 2.75261  | 0.41661  |
| C | 4.28615  | 3.23710  | -0.87244 |
| C | 2.88096  | 2.76184  | -1.17885 |
| O | 2.89467  | 1.33176  | -1.37443 |
| C | 1.84818  | 3.04292  | -0.06201 |
| O | 0.60847  | 3.36777  | -0.71852 |
| C | 1.75195  | 1.70015  | 0.64131  |
| C | 1.88647  | 0.75711  | -0.55209 |
| N | 2.26282  | -0.60582 | -0.18511 |
| C | 1.68017  | -1.68284 | -0.86138 |
| O | 0.85659  | -1.53441 | -1.75048 |
| N | 2.13282  | -2.91043 | -0.40208 |
| C | 3.00859  | -3.12256 | 0.66991  |
| O | 3.36502  | -4.24081 | 1.00404  |
| C | 3.45773  | -1.86674 | 1.28812  |
| N | 3.10667  | -0.70495 | 0.86306  |
| P | -0.67068 | 3.92101  | 0.14803  |
| O | -0.36302 | 5.26050  | 0.78034  |
| O | -1.19943 | 2.86906  | 1.11397  |
| O | -1.69037 | 4.16988  | -1.09833 |
| C | -1.86709 | 3.25419  | -2.19088 |
| C | -2.75535 | 2.05666  | -1.88783 |
| O | -2.01349 | 1.01614  | -1.23290 |
| C | -3.98587 | 2.35627  | -0.99867 |
| O | -5.13278 | 2.30985  | -1.85550 |
| C | -3.93187 | 1.27133  | 0.09887  |
| C | -2.95540 | 0.25696  | -0.49130 |
| N | -2.18868 | -0.53618 | 0.47023  |
| C | -1.34993 | -0.06201 | 1.43104  |
| N | -0.64184 | -1.02666 | 2.04766  |
| C | -1.01893 | -2.16852 | 1.44058  |
| C | -0.64031 | -3.56305 | 1.64978  |
| O | 0.11311  | -4.03246 | 2.47812  |
| N | -1.32001 | -4.41023 | 0.73558  |
| C | -2.26254 | -4.03379 | -0.18149 |
| N | -2.84700 | -4.94505 | -0.93725 |
| N | -2.63848 | -2.74208 | -0.36017 |
| C | -2.01420 | -1.90590 | 0.43610  |
| P | -6.63825 | 2.55450  | -1.23184 |
| O | -7.46594 | 3.21049  | -2.31453 |
| O | -6.56938 | 3.22647  | 0.12006  |
| O | -7.12981 | 1.00428  | -0.98515 |

|    |           |          |          |
|----|-----------|----------|----------|
| C  | -7.13061  | 0.13920  | -2.13094 |
| C  | -7.48785  | -1.26906 | -1.70691 |
| O  | -6.43006  | -1.80705 | -0.88581 |
| C  | -8.79198  | -1.38115 | -0.88861 |
| O  | -9.46195  | -2.56061 | -1.33823 |
| C  | -8.27661  | -1.52826 | 0.54047  |
| C  | -6.99960  | -2.33300 | 0.30651  |
| N  | -6.02322  | -2.23103 | 1.39039  |
| C  | -5.29730  | -3.36973 | 1.76548  |
| O  | -5.38490  | -4.44909 | 1.20590  |
| N  | -4.45506  | -3.15962 | 2.85279  |
| C  | -4.15334  | -1.92867 | 3.42480  |
| O  | -3.29222  | -1.77855 | 4.27780  |
| C  | -5.00076  | -0.85066 | 2.88956  |
| N  | -5.85347  | -1.00793 | 1.93679  |
| H  | 10.49894  | 0.51148  | -0.09291 |
| H  | 10.30620  | -0.78125 | -1.30554 |
| H  | 8.83603   | 1.23427  | -1.58434 |
| H  | 8.17496   | 1.01095  | 1.12483  |
| H  | 6.97423   | -1.02166 | 0.92405  |
| H  | 5.72096   | -0.17762 | -1.71283 |
| H  | 7.23062   | -4.94562 | -0.04231 |
| H  | 4.37871   | -4.21125 | -3.07790 |
| H  | 5.62295   | 0.13056  | 0.66623  |
| H  | 4.31381   | 4.33306  | -0.88309 |
| H  | 4.96597   | 2.85583  | -1.64428 |
| H  | 2.55170   | 3.24784  | -2.10507 |
| H  | 2.15033   | 3.86602  | 0.59171  |
| H  | 2.60792   | 1.57874  | 1.30540  |
| H  | 0.94472   | 0.67912  | -1.09963 |
| H  | 4.13829   | -1.91742 | 2.13071  |
| H  | 1.77424   | -3.73035 | -0.88344 |
| H  | 0.81732   | 1.57775  | 1.18528  |
| H  | -2.35836  | 3.83911  | -2.97361 |
| H  | -0.89499  | 2.91193  | -2.55839 |
| H  | -3.12044  | 1.66949  | -2.84940 |
| H  | -3.92306  | 3.34664  | -0.54755 |
| H  | -3.50180  | 1.70911  | 1.00286  |
| H  | -3.47343  | -0.47054 | -1.12768 |
| H  | -1.26397  | 1.01021  | 1.59966  |
| H  | -1.09716  | -5.39684 | 0.83992  |
| H  | -3.56853  | -4.64651 | -1.58413 |
| H  | -2.64595  | -5.93558 | -0.86410 |
| H  | -4.90623  | 0.83147  | 0.31473  |
| H  | -7.86466  | 0.49304  | -2.86551 |
| H  | -6.13668  | 0.13742  | -2.59317 |
| H  | -7.58242  | -1.87979 | -2.61356 |
| H  | -9.42592  | -0.49558 | -1.01548 |
| H  | -8.02301  | -0.54658 | 0.94456  |
| H  | -7.21307  | -3.39691 | 0.18988  |
| H  | -4.88144  | 0.14733  | 3.29751  |
| H  | -3.92794  | -3.97123 | 3.16282  |
| H  | -8.98229  | -2.03954 | 1.20173  |
| H  | -10.24840 | -2.67134 | -0.78012 |
| H  | 10.34485  | -1.60708 | 0.86895  |
| Na | 7.24321   | 4.73080  | 2.97741  |
| Na | -0.94432  | 4.40261  | 3.00030  |
| Na | -7.97166  | 5.06099  | -0.74779 |

XXGX

|   |         |          |          |
|---|---------|----------|----------|
| O | 9.52402 | -1.16242 | 0.62998  |
| C | 9.82895 | -0.22479 | -0.39683 |
| C | 8.54802 | 0.42776  | -0.89354 |
| O | 7.78254 | -0.49413 | -1.69288 |
| C | 7.62123 | 0.90103  | 0.23897  |
| O | 7.05569 | 2.16178  | -0.16459 |
| C | 6.58405 | -0.22192 | 0.32834  |
| C | 6.49833 | -0.70511 | -1.11858 |
| N | 6.15288 | -2.12280 | -1.28209 |
| C | 5.25617 | -2.49675 | -2.29211 |
| O | 4.65143 | -1.70547 | -2.99686 |
| N | 5.07815 | -3.87061 | -2.38993 |
| C | 5.72681 | -4.85025 | -1.64143 |
| O | 5.52562 | -6.04346 | -1.80023 |
| C | 6.65914 | -4.26542 | -0.66458 |
| N | 6.86627 | -3.00001 | -0.53283 |
| P | 6.20160 | 3.05288  | 0.92791  |
| O | 6.55060 | 4.50812  | 0.69828  |
| O | 6.35797 | 2.49852  | 2.32584  |
| O | 4.65400 | 2.76137  | 0.45523  |
| C | 4.27541 | 3.25515  | -0.83781 |



|    |           |          |          |
|----|-----------|----------|----------|
| C  | -8.86607  | -1.68621 | -0.93490 |
| O  | -9.53285  | -2.84734 | -1.43418 |
| C  | -8.36774  | -1.88422 | 0.49335  |
| C  | -7.07063  | -2.65408 | 0.24761  |
| N  | -6.12104  | -2.58220 | 1.35568  |
| C  | -5.42202  | -3.73118 | 1.74930  |
| O  | -5.59917  | -4.83623 | 1.27153  |
| N  | -4.48345  | -3.48032 | 2.74412  |
| C  | -4.19845  | -2.24839 | 3.32359  |
| O  | -3.27858  | -2.09117 | 4.11550  |
| C  | -5.06375  | -1.17783 | 2.81522  |
| N  | -5.93123  | -1.35207 | 1.87751  |
| H  | 10.40873  | 0.57529  | -0.07764 |
| H  | 10.27918  | -0.71905 | -1.29692 |
| H  | 8.74123   | 1.24160  | -1.59628 |
| H  | 8.06238   | 0.99076  | 1.10942  |
| H  | 6.92194   | -1.07425 | 0.88455  |
| H  | 5.68441   | -0.23422 | -1.76219 |
| H  | 7.25814   | -4.99062 | -0.12140 |
| H  | 4.41116   | -4.28080 | -3.16816 |
| H  | 5.54064   | 0.04153  | 0.62087  |
| H  | 4.13859   | 4.21386  | -0.92418 |
| H  | 4.84958   | 2.75927  | -1.67637 |
| H  | 2.43300   | 3.06330  | -2.18105 |
| H  | 1.97595   | 3.68209  | 0.51732  |
| H  | 2.43130   | 1.40051  | 1.24396  |
| H  | 0.88223   | 0.47277  | -1.23017 |
| H  | 4.08229   | -2.08715 | 2.05506  |
| H  | 1.73129   | -3.92726 | -0.94530 |
| H  | 0.64830   | 1.38794  | 1.04116  |
| H  | -2.52625  | 3.48452  | -3.09491 |
| H  | -1.03719  | 2.60948  | -2.65804 |
| H  | -3.23117  | 1.29983  | -2.88996 |
| H  | -4.00786  | 2.97859  | -0.55168 |
| H  | -3.73019  | 1.29838  | 0.96727  |
| H  | -3.48377  | -0.81811 | -1.20997 |
| H  | -1.17797  | -3.90385 | 0.99530  |
| H  | -5.03658  | 0.39468  | 0.14199  |
| H  | -7.96419  | 0.20166  | -2.90198 |
| H  | -6.22913  | -0.12079 | -2.63366 |
| H  | -7.62470  | -2.16683 | -2.64090 |
| H  | -9.49747  | -0.79580 | -1.03784 |
| H  | -8.13538  | -0.91670 | 0.94303  |
| H  | -7.26065  | -3.71509 | 0.07553  |
| H  | -3.92948  | -4.27960 | 3.03892  |
| H  | -9.07396  | -2.43377 | 1.12235  |
| H  | -10.33218 | -2.96968 | -0.89721 |
| H  | -0.02219  | 0.94454  | 3.21928  |
| H  | 0.13381   | -0.58701 | 4.15661  |
| H  | 1.30642   | -0.21210 | 2.90526  |
| H  | -1.52889  | 0.92831  | 1.28580  |
| H  | -4.94078  | -0.17539 | 3.21053  |
| H  | 10.31314  | -1.54576 | 0.88047  |
| Na | 7.04034   | 4.66228  | 2.97555  |
| Na | -1.10128  | 4.28926  | 2.85968  |
| Na | -8.03234  | 4.80161  | -0.73549 |

XXTX

|   |         |          |          |
|---|---------|----------|----------|
| O | 9.46417 | -1.21844 | 0.56122  |
| C | 9.75274 | -0.28953 | -0.47835 |
| C | 8.46191 | 0.34210  | -0.97675 |
| O | 7.70400 | -0.59743 | -1.76262 |
| C | 7.53453 | 0.81704  | 0.15445  |
| O | 6.95488 | 2.06799  | -0.25841 |
| C | 6.51006 | -0.31690 | 0.25963  |
| C | 6.42349 | -0.81472 | -1.18197 |
| N | 6.09220 | -2.23655 | -1.33342 |
| C | 5.18764 | -2.62937 | -2.32955 |
| O | 4.55769 | -1.85132 | -3.02680 |
| N | 5.03767 | -4.00698 | -2.42543 |
| C | 5.71457 | -4.97375 | -1.68435 |
| O | 5.54276 | -6.17081 | -1.84758 |
| C | 6.63303 | -4.36863 | -0.70668 |
| N | 6.81714 | -3.09914 | -0.57926 |
| P | 6.08729 | 2.95480  | 0.82678  |
| O | 6.40641 | 4.41354  | 0.57784  |
| O | 6.25942 | 2.42064  | 2.23064  |
| O | 4.54418 | 2.62596  | 0.36305  |
| C | 4.15748 | 3.08943  | -0.93890 |
| C | 2.77017 | 2.58017  | -1.26748 |
| O | 2.82020 | 1.14747  | -1.43637 |

|   |          |          |          |
|---|----------|----------|----------|
| C | 1.70492  | 2.86267  | -0.17999 |
| O | 0.48216  | 3.18716  | -0.87157 |
| C | 1.58473  | 1.52454  | 0.52392  |
| C | 1.78680  | 0.56942  | -0.64992 |
| N | 2.16069  | -0.78326 | -0.24413 |
| C | 1.60656  | -1.88429 | -0.91464 |
| O | 0.79382  | -1.79109 | -1.81763 |
| N | 2.07149  | -3.10556 | -0.44639 |
| C | 2.96719  | -3.30853 | 0.59959  |
| O | 3.37135  | -4.41630 | 0.91634  |
| C | 3.37188  | -2.04317 | 1.23070  |
| N | 3.00291  | -0.88132 | 0.81077  |
| P | -0.78289 | 3.82405  | -0.03812 |
| O | -0.45609 | 5.22053  | 0.44973  |
| O | -1.28406 | 2.87752  | 1.04171  |
| O | -1.83366 | 3.96110  | -1.27522 |
| C | -2.02784 | 2.98008  | -2.30645 |
| C | -2.88957 | 1.78639  | -1.91685 |
| O | -2.11762 | 0.79110  | -1.24764 |
| C | -4.09653 | 2.10063  | -1.00048 |
| O | -5.25934 | 2.08981  | -1.84128 |
| C | -4.03743 | 1.00470  | 0.08950  |
| C | -3.04514 | -0.00104 | -0.49353 |
| N | -2.25191 | -0.78692 | 0.44205  |
| C | -2.13881 | -2.16084 | 0.21923  |
| O | -2.76354 | -2.77161 | -0.63954 |
| N | -1.28135 | -2.80452 | 1.09129  |
| C | -0.47319 | -2.23715 | 2.08190  |
| O | 0.29299  | -2.94367 | 2.73532  |
| C | -0.60219 | -0.79087 | 2.19963  |
| C | 0.25522  | -0.08439 | 3.21013  |
| C | -1.45985 | -0.14023 | 1.37686  |
| P | -6.76424 | 2.25632  | -1.20100 |
| O | -7.62283 | 2.91085  | -2.26143 |
| O | -6.71856 | 2.89427  | 0.16877  |
| O | -7.19895 | 0.68194  | -0.99455 |
| C | -7.13737 | -0.15977 | -2.15556 |
| C | -7.46811 | -1.58698 | -1.77608 |
| O | -6.42718 | -2.11618 | -0.92987 |
| C | -8.79896 | -1.75700 | -1.01263 |
| O | -9.42553 | -2.93315 | -1.52944 |
| C | -8.33305 | -1.94558 | 0.42856  |
| C | -7.02758 | -2.71011 | 0.21433  |
| N | -6.09999 | -2.63670 | 1.33799  |
| C | -5.38409 | -3.77704 | 1.72359  |
| O | -5.53531 | -4.87871 | 1.22624  |
| N | -4.47135 | -3.52856 | 2.74031  |
| C | -4.21843 | -2.30245 | 3.34897  |
| O | -3.36837 | -2.16055 | 4.21492  |
| C | -5.05809 | -1.22728 | 2.80241  |
| N | -5.92147 | -1.40327 | 1.86210  |
| H | 10.40501 | 0.52062  | -0.11605 |
| H | 10.25306 | -0.77899 | -1.32706 |
| H | 8.72616  | 1.19053  | -1.61835 |
| H | 8.07159  | 0.96108  | 1.09346  |
| H | 6.92423  | -1.10267 | 0.89480  |
| H | 5.65500  | -0.27694 | -1.74100 |
| H | 7.21849  | -5.02710 | -0.07365 |
| H | 4.38084  | -4.32728 | -3.13103 |
| H | 5.54222  | 0.01375  | 0.64081  |
| H | 4.16104  | 4.18564  | -0.95979 |
| H | 4.86155  | 2.71607  | -1.69250 |
| H | 2.45241  | 3.04245  | -2.20986 |
| H | 1.99221  | 3.68758  | 0.47852  |
| H | 2.40301  | 1.41135  | 1.23604  |
| H | 0.86894  | 0.46571  | -1.23312 |
| H | 4.04788  | -2.08013 | 2.07775  |
| H | 1.71380  | -3.92527 | -0.92831 |
| H | 0.62273  | 1.40294  | 1.01279  |
| H | -2.54286 | 3.51595  | -3.10888 |
| H | -1.06015 | 2.62766  | -2.67656 |
| H | -3.28643 | 1.35906  | -2.85053 |
| H | -4.00706 | 3.08762  | -0.54569 |
| H | -3.63852 | 1.44300  | 1.00745  |
| H | -3.55761 | -0.71324 | -1.14489 |
| H | -1.19658 | -3.80586 | 0.95173  |
| H | -5.00791 | 0.54788  | 0.28842  |
| H | -7.85705 | 0.18747  | -2.90771 |
| H | -6.12983 | -0.12310 | -2.58524 |
| H | -7.51205 | -2.17688 | -2.70056 |
| H | -9.44819 | -0.88133 | -1.13184 |

|    |           |          |          |
|----|-----------|----------|----------|
| H  | -8.11609  | -0.97433 | 0.87759  |
| H  | -7.21299  | -3.77183 | 0.04143  |
| H  | -3.92259  | -4.32725 | 3.04490  |
| H  | -9.05029  | -2.49669 | 1.04386  |
| H  | -10.22920 | -3.08132 | -1.00548 |
| H  | 0.04523   | 0.98983  | 3.21035  |
| H  | 0.07409   | -0.48265 | 4.21619  |
| H  | 1.31913   | -0.23303 | 2.98651  |
| H  | -1.54550  | 0.94359  | 1.37190  |
| H  | -4.93983  | -0.22437 | 3.19788  |
| H  | 10.30779  | -1.59611 | 0.85245  |
| Na | 7.05464   | 4.63375  | 2.95489  |
| Na | -0.95701  | 4.57613  | 2.75693  |
| Na | -8.17074  | 4.70629  | -0.65447 |

XTAX

|   |          |          |          |
|---|----------|----------|----------|
| O | 9.79605  | -0.01733 | -0.02230 |
| C | 9.58065  | 1.04512  | -0.94705 |
| C | 8.08883  | 1.20045  | -1.18546 |
| O | 7.59979  | 0.05877  | -1.92602 |
| C | 7.26367  | 1.26544  | 0.12219  |
| O | 6.20656  | 2.23406  | -0.06660 |
| C | 6.69263  | -0.13913 | 0.22104  |
| C | 6.44632  | -0.43374 | -1.25496 |
| N | 6.23021  | -1.84381 | -1.56269 |
| C | 5.29246  | -2.19735 | -2.54456 |
| O | 4.64781  | -1.38957 | -3.19074 |
| N | 5.15138  | -3.57024 | -2.69727 |
| C | 5.83332  | -4.56438 | -1.99612 |
| O | 5.66186  | -5.75404 | -2.20529 |
| C | 6.75116  | -3.99869 | -0.99644 |
| N | 6.93853  | -2.73500 | -0.82595 |
| P | 5.42697  | 2.78478  | 1.26923  |
| O | 6.36418  | 3.60793  | 2.13093  |
| O | 4.73146  | 1.65297  | 2.01508  |
| O | 4.33536  | 3.77521  | 0.57844  |
| C | 3.93015  | 3.82278  | -0.79819 |
| C | 2.64194  | 3.06314  | -1.07433 |
| O | 2.90649  | 1.65463  | -1.18974 |
| C | 1.54597  | 3.21515  | 0.01333  |
| O | 0.30910  | 3.46090  | -0.67611 |
| C | 1.53466  | 1.84287  | 0.68117  |
| C | 1.83932  | 0.96147  | -0.52914 |
| N | 2.28291  | -0.39862 | -0.26144 |
| C | 1.75342  | -1.44208 | -1.03056 |
| O | 0.92649  | -1.28296 | -1.91943 |
| N | 2.23649  | -2.68843 | -0.68496 |
| C | 3.13048  | -3.01210 | 0.34181  |
| O | 3.44318  | -4.18701 | 0.53707  |
| C | 3.63779  | -1.86577 | 1.08091  |
| C | 4.64391  | -2.10839 | 2.16926  |
| C | 3.20802  | -0.63048 | 0.73528  |
| P | -1.01165 | 3.95791  | 0.16482  |
| O | -0.76872 | 5.31598  | 0.79175  |
| O | -1.50992 | 2.89116  | 1.12644  |
| O | -2.01108 | 4.16403  | -1.10749 |
| C | -2.12639 | 3.23299  | -2.19652 |
| C | -2.90096 | 1.96174  | -1.87896 |
| O | -2.07200 | 0.99716  | -1.22922 |
| C | -4.14013 | 2.16276  | -0.97714 |
| O | -5.28861 | 2.10488  | -1.83654 |
| C | -4.02893 | 1.03690  | 0.07401  |
| C | -2.95636 | 0.12549  | -0.52036 |
| N | -2.16672 | -0.65549 | 0.40298  |
| C | -1.34960 | -0.18886 | 1.41445  |
| N | -0.58613 | -1.12032 | 1.94201  |
| C | -0.89838 | -2.26704 | 1.22557  |
| C | -0.48564 | -3.61076 | 1.31994  |
| N | 0.40575  | -4.04057 | 2.25529  |
| N | -1.02577 | -4.50876 | 0.47267  |
| C | -1.94155 | -4.09007 | -0.42266 |
| N | -2.43086 | -2.86193 | -0.60435 |
| C | -1.88319 | -1.99737 | 0.26577  |
| P | -6.79865 | 2.27185  | -1.20841 |
| O | -7.65657 | 2.90630  | -2.28173 |
| O | -6.76306 | 2.92972  | 0.15252  |
| O | -7.22722 | 0.69948  | -0.98095 |
| C | -7.18027 | -0.15604 | -2.13284 |
| C | -7.44273 | -1.58732 | -1.71551 |
| O | -6.34372 | -2.06288 | -0.91306 |
| C | -8.72384 | -1.78282 | -0.87805 |

|    |           |          |          |
|----|-----------|----------|----------|
| O  | -9.33372  | -2.99511 | -1.32587 |
| C  | -8.17529  | -1.91142 | 0.54366  |
| C  | -6.87232  | -2.65650 | 0.27066  |
| N  | -5.87202  | -2.57235 | 1.32723  |
| C  | -5.04899  | -3.68443 | 1.56509  |
| O  | -5.12047  | -4.72700 | 0.93858  |
| N  | -4.15065  | -3.49807 | 2.60709  |
| C  | -3.93470  | -2.31191 | 3.29558  |
| O  | -3.07587  | -2.19108 | 4.15391  |
| C  | -4.87221  | -1.24952 | 2.89042  |
| N  | -5.75639  | -1.38520 | 1.96315  |
| H  | 9.96470   | 1.99943  | -0.55561 |
| H  | 10.07392  | 0.84413  | -1.90951 |
| H  | 7.91721   | 2.11069  | -1.77239 |
| H  | 7.88083   | 1.55168  | 0.97789  |
| H  | 7.45625   | -0.81522 | 0.60734  |
| H  | 5.55032   | 0.08637  | -1.60470 |
| H  | 7.32776   | -4.67985 | -0.37984 |
| H  | 4.48163   | -3.86604 | -3.40137 |
| H  | 5.79382   | -0.17709 | 0.82820  |
| H  | 3.75761   | 4.88092  | -1.02028 |
| H  | 4.72529   | 3.44615  | -1.44683 |
| H  | 2.24079   | 3.43255  | -2.02767 |
| H  | 1.75698   | 4.03488  | 0.70509  |
| H  | 2.34879   | 1.79968  | 1.40886  |
| H  | 0.96508   | 0.88643  | -1.17877 |
| H  | 3.61255   | 0.25343  | 1.22025  |
| H  | 1.85047   | -3.46409 | -1.21277 |
| H  | 0.57761   | 1.62413  | 1.14999  |
| H  | -2.67742  | 3.77411  | -2.97107 |
| H  | -1.13295  | 2.97675  | -2.57723 |
| H  | -3.24820  | 1.54478  | -2.83685 |
| H  | -4.12138  | 3.13609  | -0.48728 |
| H  | -3.66972  | 1.46086  | 1.01429  |
| H  | -3.40860  | -0.59843 | -1.21029 |
| H  | -1.36639  | 0.86356  | 1.66948  |
| H  | -2.33270  | -4.86328 | -1.08066 |
| H  | 0.96960   | -3.33235 | 2.70809  |
| H  | 0.87729   | -4.91574 | 2.06309  |
| H  | -4.97060  | 0.50858  | 0.23231  |
| H  | -7.94156  | 0.15471  | -2.85921 |
| H  | -6.19205  | -0.09150 | -2.60244 |
| H  | -7.51515  | -2.19643 | -2.62566 |
| H  | -9.41111  | -0.93503 | -0.98498 |
| H  | -7.95728  | -0.92195 | 0.94966  |
| H  | -7.05581  | -3.72025 | 0.10892  |
| H  | -3.52973  | -4.27915 | 2.79794  |
| H  | -8.84462  | -2.45862 | 1.21405  |
| H  | -10.10621 | -3.15101 | -0.75906 |
| H  | 10.74914  | -0.06374 | 0.14691  |
| H  | 4.90402   | -1.16801 | 2.66516  |
| H  | 4.24599   | -2.80846 | 2.91437  |
| H  | 5.55980   | -2.55410 | 1.76008  |
| H  | -4.80010  | -0.28504 | 3.38125  |
| Na | 5.95364   | 2.19684  | 4.05623  |
| Na | -1.34075  | 4.42233  | 3.00448  |
| Na | -8.20664  | 4.72981  | -0.70407 |

XTCX

|   |         |          |          |
|---|---------|----------|----------|
| O | 9.78304 | -0.08264 | -0.00766 |
| C | 9.56128 | 0.97076  | -0.94131 |
| C | 8.06845 | 1.11536  | -1.18040 |
| O | 7.58612 | -0.03564 | -1.90934 |
| C | 7.24384 | 1.18765  | 0.12678  |
| O | 6.18397 | 2.15027  | -0.06719 |
| C | 6.67737 | -0.21984 | 0.23865  |
| C | 6.43248 | -0.52540 | -1.23472 |
| N | 6.22031 | -1.93433 | -1.54322 |
| C | 5.26832 | -2.29446 | -2.51090 |
| O | 4.60025 | -1.49222 | -3.13960 |
| N | 5.15455 | -3.66902 | -2.67873 |
| C | 5.85325 | -4.66042 | -1.98703 |
| O | 5.71489 | -5.84951 | -2.22068 |
| C | 6.73495 | -4.08776 | -0.95913 |
| N | 6.90946 | -2.82257 | -0.78547 |
| P | 5.38493 | 2.69204  | 1.26113  |
| O | 6.31027 | 3.50878  | 2.14151  |
| O | 4.67457 | 1.55844  | 1.98969  |
| O | 4.31131 | 3.69225  | 0.55549  |
| C | 3.90559 | 3.70833  | -0.82169 |
| C | 2.62827 | 2.92953  | -1.08898 |







|    |           |          |          |
|----|-----------|----------|----------|
| H  | 1.12811   | 3.70254  | 0.93941  |
| H  | 4.77819   | -0.76149 | 0.58063  |
| H  | 7.66643   | 0.82240  | -3.78013 |
| H  | 6.06860   | 0.59533  | -3.02718 |
| H  | 7.54391   | 2.67093  | -2.46988 |
| H  | 9.29853   | 0.67571  | -1.28822 |
| H  | 8.04055   | 0.65113  | 0.73040  |
| H  | 7.25082   | 3.53526  | 0.08753  |
| H  | 3.90458   | 4.16376  | 3.00817  |
| H  | 9.03663   | 2.11738  | 1.06533  |
| H  | 10.43905  | 2.63009  | -0.92620 |
| H  | -10.76319 | 0.36288  | 0.05665  |
| H  | -7.17643  | 4.96013  | -0.16143 |
| H  | 4.94706   | 0.07768  | 3.31600  |
| H  | -0.16642  | -1.08089 | 3.19541  |
| H  | -0.18097  | 0.39531  | 4.19566  |
| H  | -1.42993  | 0.15441  | 2.97097  |
| H  | -4.83757  | 1.23243  | 2.72212  |
| H  | -4.13904  | 2.83784  | 3.06236  |
| H  | -5.45071  | 2.68136  | 1.88717  |
| Na | -6.02320  | -2.21863 | 3.80177  |
| Na | 0.95946   | -4.78321 | 2.75398  |
| Na | 7.87249   | -3.66621 | 0.41668  |
